## Association and interaction effects of Alzheimer's disease-associated genes and lifestyle on cognitive aging in older adults in a Taiwanese population

Eugene Lin<sup>1,2,3,\*</sup>, Shih-Jen Tsai<sup>4,5,\*</sup>, Po-Hsiu Kuo<sup>6</sup>, Yu-Li Liu<sup>7</sup>, Albert C. Yang<sup>4,5</sup> and Chung-Feng Kao<sup>8</sup>

<sup>1</sup> Institute of Biomedical Sciences, China Medical University, Taichung, Taiwan

<sup>2</sup> Vita Genomics, Inc., Taipei, Taiwan

<sup>3</sup> TickleFish Systems Corporation, Seattle, WA, USA

<sup>4</sup> Department of Psychiatry, Taipei Veterans General Hospital, Taipei, Taiwan

<sup>5</sup> Division of Psychiatry, National Yang-Ming University, Taipei, Taiwan

<sup>6</sup> Department of Public Health, Institute of Epidemiology and Preventive Medicine, National Taiwan University, Taipei, Taiwan

<sup>7</sup> Center for Neuropsychiatric Research, National Health Research Institutes, Miaoli County, Taiwan

<sup>8</sup> Department of Agronomy, College of Agriculture & Natural Resources, National Chung Hsing University, Taichung, Taiwan

\* These authors have contributed equally to this work

**Correspondence to:** Eugene Lin, **email:** eugene.lin@vitagenomics.com

Shih-Jen Tsai, **email:** tsai610913@gmail.com

**Keywords:** Alzheimer's diseases; cognitive aging; gene-gene and gene-lifestyle interactions; Mini-Mental State Examination; single nucleotide polymorphisms; Gerotarget

**Received:** October 17, 2016

**Accepted:** January 29, 2017

**Published:** February 11, 2017

Copyright: Lin et al. This is an open-access article distributed under the terms of the Creative Commons Attribution License (CC-BY), which permits unrestricted use, distribution, and reproduction in any medium, provided the original author and source are credited.

### ABSTRACT

Genome-wide association studies and meta-analyses implicated that increased risk of developing Alzheimer's diseases (AD) has been associated with the *ABCA7*, *APOE*, *BIN1*, *CASS4*, *CD2AP*, *CD33*, *CELF1*, *CLU*, *CR1*, *DSG2*, *EPHA1*, *FERMT2*, *HLA-DRB1*, *HLA-DRB4*, *INPP5D*, *MEF2C*, *MS4A4A*, *MS4A4E*, *MS4A6E*, *NME8*, *PICALM*, *PLD3*, *PTK2B*, *RIN3*, *SLC24A4*, *SORL1*, and *ZCWPW1* genes. In this study, we assessed whether single nucleotide polymorphisms (SNPs) within these 27 AD-associated genes are linked with cognitive aging independently and/or through complex interactions in an older Taiwanese population. We also analyzed the interactions between lifestyle and these genes in influencing cognitive aging. A total of 634 Taiwanese subjects aged over 60 years from the Taiwan Biobank were analyzed. Mini-Mental State Examination (MMSE) scores were performed for all subjects to evaluate cognitive functions. Out of the 588 SNPs tested in this study, only the association between *CASS4*-rs911159 and cognitive aging persisted significantly ( $P = 2.2 \times 10^{-5}$ ) after Bonferroni correction. Our data also showed a nominal association of cognitive aging with the SNPs in six more key AD-associated genes, including *EPHA1*-rs10952552, *FERMT2*-rs4901317, *MEF2C*-rs9293506, *PLD3*-rs11672825, *RIN3*-rs1885747, and *SLC24A4*-rs67063100 ( $P = 0.0018 \sim 0.0097$ ). Additionally, we found the interactions among *CASS4*-rs911159, *EPHA1*-rs10952552, *FERMT2*-rs4901317, *MEF2C*-rs9293506, or *SLC24A4*-rs67063100 on cognitive aging ( $P = 0.004 \sim 0.035$ ). Moreover, our analysis suggested the interactions of *SLC24A4*-rs67063100 or *MEF2C*-rs9293506 with lifestyle such as alcohol consumption, smoking status, physical activity, or social support on cognitive aging ( $P = 0.008 \sim 0.041$ ). Our study indicates that the AD-associated genes may contribute to the risk of cognitive aging independently as well as through gene-gene and gene-lifestyle interactions.

## INTRODUCTION

Cognitive aging is considered as a gradual and ongoing process of change in cognitive capacity with advancing age [1]. It is worth mentioning that cognitive aging may increase the likelihood of several neurodegenerative disorders, such as mild cognitive impairment, dementia, and Alzheimer's diseases (AD) since prior work has estimated that rates of neurodegenerative disorders increase exponentially with age [2]. With ever-increasing elder populations not only in affluent societies but also in developing countries, the pervasiveness of neurodegenerative disorders has turned out to be a mammoth public health issue [3]. In this regard, biomarkers have become increasingly essential to grasp the biology of cognitive aging [4]. The search for biomarkers for cognitive aging has been active, and the same biomarkers for AD are also commonly employed in cognitive aging research due to a high prevalence of AD in the older adults [5].

Several genome-wide association studies (GWAS) indicated that single nucleotide polymorphisms (SNPs) within 11 genes are associated with AD risk, including the ATP binding cassette subfamily A member 7 (*ABCA7*), apolipoprotein E (*APOE*), bridging integrator 1 (*BINI*), CD2 associated protein (*CD2AP*), CD33 molecule (*CD33*), clusterin (*CLU*), complement C3b/C4b receptor 1 (*CR1*), EPH receptor A1 (*EPHA1*), membrane spanning 4-domains A4A (*MS4A4A*), membrane spanning 4-domains A4E (*MS4A4E*), membrane spanning 4-domains A6E (*MS4A6E*), and phosphatidylinositol binding clathrin assembly protein (*PICALM*) genes [6-10]. The subsequent meta-analysis of GWAS studies ( $n = 74,046$ ) by Lambert et al. further tracked down 14 AD risk genes, including the Cas scaffolding protein family member 4 (*CASS4*), CUGBP Elav-like family member 1 (*CELF1*), desmoglein 2 (*DSG2*), fermitin family member 2 (*FERMT2*), major histocompatibility complex class II DR beta 1 (*HLA-DRB1*), major histocompatibility complex class II DR beta 4 (*HLA-DRB4*), inositol polyphosphate-5-phosphatase D (*INPP5D*), myocyte enhancer factor 2C (*MEF2C*), NME/NM23 family member 8 (*NME8*), protein tyrosine kinase 2 beta (*PTK2B*), Ras and Rab interactor 3 (*RIN3*), solute carrier family 24 member 4 (*SLC24A4*), sortilin related receptor 1 (*SORL1*), zinc finger CW-type and PWWP domain containing 1 (*ZCWPWI*) [11]. Additionally, Cruchaga et al. performed whole-exome sequencing and identified the phospholipase D family member 3 (*PLD3*) gene as an AD risk gene [12]. Recent epistasis studies further indicated that the *CLU-MS4A4E* [13, 14] and *CD33-MS4A4E* [13] gene-gene interactions may have a major impact in modulating AD susceptibility. By using the established AD-associated genes, Chibnik et al. also found an association of cognitive decline with the *CR1* rs6656401 SNP, but not with the *CLU* rs11136000 and *PICALM* rs7110631 SNPs [15]. Moreover,

Nettiksimmons et al. utilized the AD-associated genes and demonstrated that the *ABCA7* rs3764650 and *CD33* rs3865444 SNPs were associated with cognitive decline in the female cohort of Caucasian older adults, but not in the male cohort [16].

While several encouraging findings on the relationship between the AD-associated genes and cognitive aging have emerged, to our knowledge, human data is scarce in terms of single nucleotide polymorphisms (SNPs). Moreover, lifestyle factors such as alcohol consumption, smoking status, physical activity, and social support have not received as much attention as genetic factors in cognitive aging research, and thus the interplay between the AD-associated genes and lifestyle should be thoroughly investigated. Given that gene-gene and gene-lifestyle interactions may play a key role in the development of cognitive aging, we hypothesized that the AD-associated genes may contribute to the etiology of cognitive aging independently and/or through complex interactions. The gene panel encompasses 27 aforementioned AD-associated genes (Supplementary Table 1), including the *ABCA7*, *APOE*, *BINI*, *CASS4*, *CD2AP*, *CD33*, *CELF1*, *CLU*, *CR1*, *DSG2*, *EPHA1*, *FERMT2*, *HLA-DRB1*, *HLA-DRB4*, *INPP5D*, *MEF2C*, *MS4A4A*, *MS4A4E*, *MS4A6E*, *NME8*, *PICALM*, *PLD3*, *PTK2B*, *RIN3*, *SLC24A4*, *SORL1*, and *ZCWPWI* genes.

## RESULTS

Table 1 describes the demographic and clinical characteristics of the study population, including 634 subjects. The median MMSE score was 27 and interquartile range was 25-29.

First, we investigated the association between cognitive aging and 27 AD-associated genes. Among the 588 SNPs assessed in this study (Supplementary Table S1), there were 63 SNPs in the 17 AD-associated genes showing an evidence of association ( $P < 0.05$ ) with MMSE scores as shown in Table 2. However, only the association of the *CASS4* rs911159 SNP with MMSE scores reached a significance after Bonferroni correction, where the three separate genetic models were taken into account ( $P < 0.05/(586 \times 3) = 2.8 \times 10^{-5}$ ). As demonstrated in Table 2, the *CASS4* rs911159 SNP indicated an association with MMSE scores among subjects after adjustment of covariates such as age, gender, and education for genetic models, including the additive model ( $P = 2.2 \times 10^{-5}$ ) and recessive model ( $P = 2.2 \times 10^{-5}$ ).

Furthermore, the distribution of *APOE* alleles ( $\epsilon 2$ ,  $\epsilon 3$ , and  $\epsilon 4$ ) in our sample was 6.2%, 82.7%, and 11.1%, respectively (Supplementary Table S2A). Additionally, we found that the presence of the *APOE*  $\epsilon 4$  allele had no significant effects in MMSE scores (Supplementary Table S2B). We also examined whether the genetic load of *APOE*  $\epsilon 4$  (that is, non-carrier, heterozygous, and homozygous for the  $\epsilon 4$  allele) has a significant impact in

**Table 1: Demographic and clinical characteristics of study subjects.**

| Characteristic             | Overall     |
|----------------------------|-------------|
| No. of subjects, n         | 634         |
| Mean age ± SD, years       | 64.2±2.9    |
| Male, %/Female, %          | 50.16/49.84 |
| Married, %                 | 82.01       |
| Living alone, %            | 8.51        |
| Any physical activity, %   | 63.72       |
| Current alcohol drinker, % | 5.52        |
| Current smoker, %          | 6.46        |
| High school graduate, %    | 59.30       |
| MMSE score, median (IQR)   | 27 (25–29)  |

IQR = interquartile range, MMSE = Mini-Mental State Examination, SD = standard deviation. Data are presented as mean ± standard deviation.

**Table 2: Linear regression models of associations between the MMSE scores and 17 selective AD-related genes, which have an evidence of association ( $P < 0.05$ ).**

| Gene   | CHR | SNP        | A1 | A2 | MAF  | Additive model |      |                              | Recessive model |      |                              | Dominant model |      |        |
|--------|-----|------------|----|----|------|----------------|------|------------------------------|-----------------|------|------------------------------|----------------|------|--------|
|        |     |            |    |    |      | BETA           | SE   | P                            | BETA            | SE   | P                            | BETA           | SE   | P      |
| CASS4  | 20  | rs11698292 | C  | T  | 0.13 | -1.50          | 0.53 | <b>0.0051</b>                | -3.00           | 1.06 | <b>0.0051</b>                | -0.16          | 0.26 | 0.5446 |
|        |     | rs17365060 | G  | A  | 0.15 | -1.09          | 0.43 | 0.0114                       | -2.17           | 0.86 | 0.0118                       | -0.19          | 0.25 | 0.4350 |
|        |     | rs6069746  | C  | T  | 0.16 | -1.21          | 0.43 | <b>0.0051</b>                | -2.37           | 0.86 | <b>0.0060</b>                | -0.33          | 0.25 | 0.1917 |
| CD2AP  | 6   | rs911159   | A  | G  | 0.15 | -2.13          | 0.50 | <b>2.2 x 10<sup>-5</sup></b> | -4.24           | 0.99 | <b>2.2 x 10<sup>-5</sup></b> | -0.25          | 0.25 | 0.3264 |
|        |     | rs1485785  | C  | T  | 0.40 | -0.16          | 0.17 | 0.3285                       | 0.03            | 0.30 | 0.9296                       | -0.53          | 0.24 | 0.0259 |
|        |     | rs28360587 | G  | T  | 0.39 | -0.16          | 0.17 | 0.3361                       | 0.04            | 0.30 | 0.8859                       | -0.55          | 0.24 | 0.0212 |
| CD33   | 19  | rs9357542  | G  | A  | 0.30 | -0.27          | 0.20 | 0.1837                       | -0.28           | 0.38 | 0.4709                       | -0.53          | 0.22 | 0.0182 |
|        |     | rs1354106  | G  | T  | 0.23 | 0.49           | 0.30 | 0.1041                       | 0.81            | 0.60 | 0.1791                       | 0.54           | 0.23 | 0.0198 |
|        |     | rs1803254  | C  | G  | 0.31 | 0.21           | 0.21 | 0.3331                       | 0.17            | 0.41 | 0.6759                       | 0.50           | 0.22 | 0.0258 |
| CRI    | 1   | rs12033963 | A  | G  | 0.23 | 0.44           | 0.27 | 0.0998                       | 0.73            | 0.53 | 0.1654                       | 0.47           | 0.23 | 0.0430 |
|        |     | rs12034383 | A  | G  | 0.37 | -0.19          | 0.18 | 0.2753                       | -0.13           | 0.33 | 0.6941                       | -0.48          | 0.23 | 0.0357 |
| EPHA1  | 7   | rs10952552 | A  | G  | 0.22 | 0.72           | 0.24 | <b>0.0026</b>                | 1.47            | 0.47 | <b>0.0018</b>                | 0.15           | 0.23 | 0.5023 |
| FERMT2 | 14  | rs4901317  | C  | T  | 0.05 | -2.34          | 0.81 | <b>0.0041</b>                | -4.62           | 1.63 | <b>0.0047</b>                | -0.85          | 0.35 | 0.0155 |
| MEF2C  | 5   | rs11949307 | T  | G  | 0.18 | -0.74          | 0.37 | 0.0466                       | -1.54           | 0.74 | 0.0374                       | 0.07           | 0.24 | 0.7665 |
|        |     | rs770463   | T  | C  | 0.35 | -0.32          | 0.18 | 0.0706                       | -0.77           | 0.33 | 0.0206                       | 0.05           | 0.23 | 0.8429 |
|        |     | rs7737567  | T  | C  | 0.12 | -1.22          | 0.58 | 0.0360                       | -2.39           | 1.16 | 0.0393                       | -0.27          | 0.26 | 0.2992 |
| MS4A4A | 11  | rs9293506  | T  | C  | 0.12 | -1.43          | 0.54 | <b>0.0081</b>                | -2.80           | 1.07 | <b>0.0092</b>                | -0.33          | 0.26 | 0.2157 |
|        |     | rs12283601 | A  | G  | 0.28 | -0.42          | 0.21 | 0.0401                       | -0.70           | 0.40 | 0.0794                       | -0.44          | 0.22 | 0.0495 |
|        |     | rs1365246  | C  | T  | 0.17 | -0.23          | 0.35 | 0.5189                       | -0.30           | 0.70 | 0.6639                       | -0.53          | 0.25 | 0.0368 |
| MS4A4E | 11  | rs7104122  | C  | G  | 0.17 | -0.28          | 0.33 | 0.3938                       | -0.43           | 0.66 | 0.5143                       | -0.51          | 0.25 | 0.0402 |
|        |     | rs4939320  | C  | T  | 0.31 | 0.35           | 0.19 | 0.0612                       | 0.52            | 0.36 | 0.1484                       | 0.47           | 0.23 | 0.0419 |
|        |     | rs607639   | A  | G  | 0.16 | -0.79          | 0.37 | 0.0318                       | -1.47           | 0.74 | 0.0461                       | -0.56          | 0.25 | 0.0263 |
| MS4A6E | 11  | rs650853   | T  | C  | 0.16 | -0.71          | 0.36 | 0.0464                       | -1.32           | 0.71 | 0.0657                       | -0.55          | 0.25 | 0.0309 |
|        |     | rs662674   | A  | G  | 0.16 | -0.74          | 0.38 | 0.0544                       | -1.37           | 0.76 | 0.0734                       | -0.51          | 0.25 | 0.0439 |
|        |     | rs718376   | A  | G  | 0.31 | 0.35           | 0.18 | 0.0562                       | 0.49            | 0.35 | 0.1567                       | 0.50           | 0.22 | 0.0268 |
| MS4A6E | 11  | rs11230281 | C  | A  | 0.49 | -0.19          | 0.16 | 0.2208                       | -0.52           | 0.26 | 0.0448                       | 0.01           | 0.26 | 0.9815 |
|        |     | rs2289612  | A  | C  | 0.38 | -0.33          | 0.17 | 0.0571                       | -0.38           | 0.32 | 0.2365                       | -0.57          | 0.23 | 0.0128 |

|                |    |            |   |   |      |       |      |               |       |      |               |       |      |               |
|----------------|----|------------|---|---|------|-------|------|---------------|-------|------|---------------|-------|------|---------------|
|                |    | rs2289614  | C | G | 0.10 | 0.44  | 0.47 | 0.3481        | 0.80  | 0.95 | 0.3989        | 0.61  | 0.29 | 0.0399        |
| <i>PICALM</i>  | 11 | rs11234495 | T | C | 0.50 | -0.25 | 0.16 | 0.1150        | -0.13 | 0.26 | 0.6105        | -0.54 | 0.26 | 0.0391        |
|                |    | rs592314   | A | G | 0.33 | 0.40  | 0.20 | 0.0426        | 0.89  | 0.38 | 0.0187        | 0.00  | 0.22 | 0.9974        |
|                |    | rs669556   | C | T | 0.33 | 0.40  | 0.20 | 0.0473        | 0.86  | 0.38 | 0.0261        | 0.04  | 0.23 | 0.8591        |
| <i>PLD3</i>    | 19 | rs11672825 | T | G | 0.50 | 0.38  | 0.16 | 0.0160        | 0.34  | 0.26 | 0.1928        | 0.68  | 0.25 | <b>0.0071</b> |
|                |    | rs4490097  | A | C | 0.47 | 0.28  | 0.16 | 0.0828        | 0.27  | 0.27 | 0.3329        | 0.49  | 0.25 | 0.0488        |
|                |    | rs7507651  | T | G | 0.47 | 0.30  | 0.16 | 0.0600        | 0.27  | 0.27 | 0.3177        | 0.54  | 0.25 | 0.0278        |
| <i>PTK2B</i>   | 8  | rs10109834 | C | A | 0.16 | 0.75  | 0.36 | 0.0372        | 1.51  | 0.71 | 0.0346        | 0.09  | 0.25 | 0.7298        |
| <i>RIN3</i>    | 14 | rs10467865 | G | A | 0.22 | 0.31  | 0.26 | 0.2216        | 0.46  | 0.50 | 0.3673        | 0.50  | 0.23 | 0.0294        |
|                |    | rs11627032 | C | T | 0.28 | -0.34 | 0.22 | 0.1285        | -0.49 | 0.44 | 0.2603        | -0.47 | 0.22 | 0.0349        |
|                |    | rs12884739 | A | G | 0.41 | 0.19  | 0.16 | 0.2369        | 0.57  | 0.29 | 0.0500        | -0.14 | 0.23 | 0.5464        |
|                |    | rs1885747  | G | A | 0.18 | -0.90 | 0.35 | <b>0.0097</b> | -1.69 | 0.69 | 0.0150        | -0.49 | 0.24 | 0.0399        |
|                |    | rs4904957  | A | G | 0.38 | -0.20 | 0.18 | 0.2496        | -0.05 | 0.33 | 0.8781        | -0.59 | 0.23 | 0.0103        |
|                |    | rs4904960  | C | T | 0.38 | 0.38  | 0.18 | 0.0329        | 0.69  | 0.32 | 0.0346        | 0.26  | 0.23 | 0.2626        |
|                |    | rs8012413  | A | G | 0.14 | -0.01 | 0.35 | 0.9853        | 0.15  | 0.70 | 0.8283        | -0.56 | 0.25 | 0.0245        |
|                |    | rs8017311  | A | G | 0.35 | 0.43  | 0.18 | 0.0166        | 0.72  | 0.34 | 0.0320        | 0.40  | 0.23 | 0.0771        |
|                |    | rs9323880  | T | C | 0.22 | 0.42  | 0.26 | 0.1081        | 0.70  | 0.51 | 0.1738        | 0.47  | 0.23 | 0.0434        |
|                |    | rs943655   | A | C | 0.32 | 0.42  | 0.19 | 0.0313        | 0.82  | 0.37 | 0.0270        | 0.19  | 0.23 | 0.4052        |
|                |    | rs9788457  | C | T | 0.26 | -0.22 | 0.23 | 0.3197        | -0.23 | 0.44 | 0.6101        | -0.53 | 0.22 | 0.0189        |
| <i>SLC24A4</i> | 14 | rs72631607 | A | G | 0.48 | 0.22  | 0.16 | 0.1548        | 0.56  | 0.26 | 0.0321        | 0.03  | 0.25 | 0.9177        |
|                |    | rs8022236  | A | G | 0.31 | -0.31 | 0.22 | 0.1643        | -0.86 | 0.43 | 0.0436        | 0.35  | 0.23 | 0.1360        |
|                |    | rs12435024 | A | G | 0.32 | -0.51 | 0.19 | <b>0.0065</b> | -0.99 | 0.35 | <b>0.0054</b> | -0.26 | 0.23 | 0.2517        |
|                |    | rs10138927 | C | G | 0.20 | -0.58 | 0.28 | 0.0378        | -1.14 | 0.56 | 0.0411        | -0.24 | 0.24 | 0.3164        |
|                |    | rs10431740 | T | C | 0.24 | -0.51 | 0.18 | <b>0.0055</b> | -1.03 | 0.36 | <b>0.0041</b> | -0.28 | 0.23 | 0.2292        |
|                |    | rs61977311 | A | G | 0.23 | -0.71 | 0.27 | <b>0.0099</b> | -1.22 | 0.54 | 0.0256        | -0.64 | 0.23 | <b>0.0049</b> |
|                |    | rs67063100 | A | G | 0.17 | -0.66 | 0.33 | 0.0447        | -1.15 | 0.66 | 0.0811        | -0.71 | 0.24 | <b>0.0038</b> |
|                |    | rs11160069 | T | C | 0.45 | -0.35 | 0.17 | 0.0380        | -0.47 | 0.30 | 0.1208        | -0.46 | 0.24 | 0.0537        |
|                |    | rs12434016 | G | T | 0.38 | -0.49 | 0.17 | <b>0.0041</b> | -0.73 | 0.31 | 0.0194        | -0.58 | 0.23 | 0.0127        |
|                |    | rs10431637 | C | A | 0.15 | -0.63 | 0.38 | 0.0998        | -1.13 | 0.76 | 0.1395        | -0.58 | 0.25 | 0.0199        |
|                |    | rs78739077 | T | G | 0.11 | -1.42 | 0.63 | 0.0253        | -2.77 | 1.26 | 0.0287        | -0.42 | 0.27 | 0.1273        |
| <i>SORL1</i>   | 11 | rs3781825  | C | T | 0.13 | 0.25  | 0.45 | 0.5769        | 0.67  | 0.90 | 0.4597        | -0.63 | 0.26 | 0.0163        |
|                |    | rs3862605  | C | T | 0.17 | 0.33  | 0.29 | 0.2521        | 0.55  | 0.58 | 0.3450        | 0.49  | 0.25 | 0.0460        |
|                |    | rs4631890  | A | G | 0.30 | 0.30  | 0.21 | 0.1456        | 0.81  | 0.40 | 0.0441        | -0.25 | 0.22 | 0.2666        |
|                |    | rs4936632  | G | A | 0.43 | -0.09 | 0.16 | 0.6016        | 0.25  | 0.29 | 0.3854        | -0.53 | 0.25 | 0.0330        |
|                |    | rs661057   | T | C | 0.45 | -0.02 | 0.16 | 0.8823        | 0.39  | 0.27 | 0.1551        | -0.51 | 0.24 | 0.0373        |
| <i>ZCWPW1</i>  | 7  | rs5015755  | T | G | 0.15 | 0.74  | 0.35 | 0.0352        | 1.49  | 0.69 | 0.0321        | 0.08  | 0.25 | 0.7478        |

A1 = minor allele, A2 = major allele, AD = Alzheimer's disease, BETA = Beta coefficients, Chr = chromosome, MAF = minor allele frequency, MMSE = Mini-Mental State Examination, SE = standard error. Analysis was obtained after adjustment for covariates including age, gender, and education. *P* values of < 0.01 are shown in bold.

MMSE scores. Our results revealed that MMSE scores were associated with neither *APOE* ε4 homozygotes nor heterozygotes (Supplementary Table S2B).

Then, we identified a nominal association of MMSE scores with 12 more SNPs, including *CASS4*

(rs11698292, rs6069746), *EPHA1* rs10952552, *FERMT2* rs4901317, *MEF2C* rs9293506, *PLD3* rs11672825, *RIN3* rs1885747, and *SLC24A4* (rs12435024, rs10431740, rs61977311, rs67063100, rs12434016) (Table 2). For further investigation in the subsequent analyses, we

**Table 3: Gene-gene interaction models identified by the GMDR method with adjustment for age, gender, and education.**

| Interaction model                                  | Testing accuracy (%) | P value      |
|----------------------------------------------------|----------------------|--------------|
| <i>CASS4</i> rs911159, <i>EPHA1</i> rs10952552     | 52.56                | 0.259        |
| <i>CASS4</i> rs911159, <i>FERMT2</i> rs4901317     | 53.57                | 0.139        |
| <i>CASS4</i> rs911159, <i>MEF2C</i> rs9293506      | 52.52                | 0.262        |
| <i>CASS4</i> rs911159, <i>PLD3</i> rs11672825      | 55.85                | 0.059        |
| <i>CASS4</i> rs911159, <i>RIN3</i> rs1885747       | 48.31                | 0.699        |
| <i>CASS4</i> rs911159, <i>SLC24A4</i> rs67063100   | 56.53                | <b>0.035</b> |
| <i>EPHA1</i> rs10952552, <i>FERMT2</i> rs4901317   | 46.39                | 0.840        |
| <i>EPHA1</i> rs10952552, <i>MEF2C</i> rs9293506    | 55.12                | 0.093        |
| <i>EPHA1</i> rs10952552, <i>PLD3</i> rs11672825    | 51.36                | 0.361        |
| <i>EPHA1</i> rs10952552, <i>RIN3</i> rs1885747     | 49.35                | 0.626        |
| <i>EPHA1</i> rs10952552, <i>SLC24A4</i> rs67063100 | 57.69                | <b>0.016</b> |
| <i>FERMT2</i> rs4901317, <i>MEF2C</i> rs9293506    | 57.47                | <b>0.008</b> |
| <i>FERMT2</i> rs4901317, <i>PLD3</i> rs11672825    | 49.84                | 0.519        |
| <i>FERMT2</i> rs4901317, <i>RIN3</i> rs1885747     | 48.37                | 0.691        |
| <i>FERMT2</i> rs4901317, <i>SLC24A4</i> rs67063100 | 58.48                | <b>0.004</b> |
| <i>MEF2C</i> rs9293506, <i>PLD3</i> rs11672825     | 55.02                | 0.104        |
| <i>MEF2C</i> rs9293506, <i>RIN3</i> rs1885747      | 49.65                | 0.570        |
| <i>MEF2C</i> rs9293506, <i>SLC24A4</i> rs67063100  | 58.05                | <b>0.009</b> |
| <i>PLD3</i> rs11672825, <i>RIN3</i> rs1885747      | 48.96                | 0.600        |
| <i>PLD3</i> rs11672825, <i>SLC24A4</i> rs67063100  | 54.65                | 0.142        |
| <i>RIN3</i> rs1885747, <i>SLC24A4</i> rs67063100   | 55.34                | 0.085        |

GMDR = generalized multifactor dimensionality reduction.

P value was based on 1,000 permutations. Analysis was obtained after adjustment for covariates including age, gender, and education. P values of < 0.05 are shown in bold.

selected seven key SNPs in seven AD-associated genes with evidence of association, including *CASS4* rs911159 ( $P = 2.2 \times 10^{-5}$ ), *EPHA1* rs10952552 ( $P = 0.0018$ ), *FERMT2* rs4901317 ( $P = 0.0041$ ), *MEF2C* rs9293506 ( $P = 0.0081$ ), *PLD3* rs11672825 ( $P = 0.0071$ ), *RIN3* rs1885747 ( $P = 0.0097$ ), and *SLC24A4* rs67063100 ( $P = 0.0038$ ). In addition, the genotype frequency distributions for the *CASS4* rs911159, *EPHA1* rs10952552, *FERMT2* rs4901317, *MEF2C* rs9293506, *PLD3* rs11672825, *RIN3* rs1885747, and *SLC24A4* rs67063100 SNPs were in accordance with the Hardy-Weinberg equilibrium among the subjects ( $P = 0.126, 0.253, 0.611, 0.271, 0.800, 0.416,$  and  $0.649$ , respectively).

Next, we employed categorized MMSE scores as an outcome (normal: MMSE score  $\geq 24$ ; cognitive impairment: MMSE score  $< 24$ ) for gene-gene and gene-lifestyle analysis. First, the GMDR analysis was used to assess the impacts of combinations between the seven key SNPs in cognitive aging including age, gender, and education as covariates. Table 3 summarizes the results obtained from GMDR analysis for two-way gene-gene interaction models with covariate adjustment. As shown in Table 3, there was a significant two-way model involving *CASS4* rs911159 and *SLC24A4* rs67063100 ( $P = 0.035$ ), *EPHA1* rs10952552 and *SLC24A4* rs67063100 ( $P = 0.016$ ), *FERMT2* rs4901317 and *MEF2C* rs9293506 ( $P = 0.008$ ), *FERMT2* rs4901317 and *SLC24A4* rs67063100 ( $P = 0.004$ ), as well as *MEF2C* rs9293506 and *SLC24A4* rs67063100 ( $P = 0.009$ ), indicating a potential gene-

gene interaction between *CASS4* and *SLC24A4*, between *EPHA1* and *SLC24A4*, between *FERMT2* and *MEF2C*, between *FERMT2* and *SLC24A4*, as well as between *MEF2C* and *SLC24A4* in influencing cognitive aging.

Furthermore, we utilized multivariable logistic regression analysis with adjustment for age, gender, and education to assess the two-way gene-gene interaction models selected by the GMDR method (Supplementary Table S3). Our analysis revealed that the carriers with the AA genotype of *CASS4* rs911159 and the GG genotype of *SLC24A4* rs67063100 had a 7.05-fold increased risk for cognitive aging, compared to those with the GG genotype of *CASS4* rs911159 and the GG genotype of *SLC24A4* rs67063100 (Supplementary Table S3). Additionally, the carriers with the AG genotype of *EPHA1* rs10952552 and the A allele of *SLC24A4* rs67063100 had a 2.26-fold increased risk for cognitive aging, compared to those with the GG genotype of *EPHA1* rs10952552 and the GG genotype of *SLC24A4* rs67063100 (Supplementary Table S3). Moreover, the carriers with the TT genotype of *FERMT2* rs4901317 and the GG genotype of *SLC24A4* rs67063100 had a 0.23-fold increased risk for cognitive aging, compared to those with the CT genotype of *FERMT2* rs4901317 and the A allele of *SLC24A4* rs67063100 (Supplementary Table S3). Similarly, the carriers with the TC genotype of *MEF2C* rs9293506 and the A allele of *SLC24A4* rs67063100 had a 2.79-fold increased risk for cognitive aging, compared to those with the CC genotype of *MEF2C* rs9293506 and the GG

**Table 4: Gene-lifestyle interaction models identified by the GMDR method with adjustment for age, gender, and education.**

| Interaction model                              | Testing accuracy (%) | P value      |
|------------------------------------------------|----------------------|--------------|
| <i>CASS4</i> rs911159, smoking                 | 50.85                | 0.416        |
| <i>CASS4</i> rs911159, alcohol consumption     | 52.15                | 0.287        |
| <i>CASS4</i> rs911159, physical activity       | 50.03                | 0.520        |
| <i>CASS4</i> rs911159, social support          | 52.68                | 0.233        |
| <i>EPHA1</i> rs10952552, smoking               | 52.40                | 0.275        |
| <i>EPHA1</i> rs10952552, alcohol consumption   | 52.74                | 0.247        |
| <i>EPHA1</i> rs10952552, physical activity     | 47.16                | 0.766        |
| <i>EPHA1</i> rs10952552, social support        | 53.76                | 0.156        |
| <i>FERMT2</i> rs4901317, smoking               | 50.75                | 0.388        |
| <i>FERMT2</i> rs4901317, alcohol consumption   | 50.25                | 0.461        |
| <i>FERMT2</i> rs4901317, physical activity     | 45.70                | 0.862        |
| <i>FERMT2</i> rs4901317, social support        | 50.99                | 0.388        |
| <i>MEF2C</i> rs9293506, smoking                | 54.39                | 0.081        |
| <i>MEF2C</i> rs9293506, alcohol consumption    | 53.75                | 0.147        |
| <i>MEF2C</i> rs9293506, physical activity      | 52.53                | 0.282        |
| <i>MEF2C</i> rs9293506, social support         | 55.65                | <b>0.039</b> |
| <i>PLD3</i> rs11672825, smoking                | 47.86                | 0.690        |
| <i>PLD3</i> rs11672825, alcohol consumption    | 50.39                | 0.449        |
| <i>PLD3</i> rs11672825, physical activity      | 49.04                | 0.598        |
| <i>PLD3</i> rs11672825, social support         | 49.87                | 0.535        |
| <i>RIN3</i> rs1885747, smoking                 | 45.49                | 0.899        |
| <i>RIN3</i> rs1885747, alcohol consumption     | 46.39                | 0.838        |
| <i>RIN3</i> rs1885747, physical activity       | 46.13                | 0.857        |
| <i>RIN3</i> rs1885747, social support          | 47.95                | 0.723        |
| <i>SLC24A4</i> rs67063100, smoking             | 55.86                | <b>0.041</b> |
| <i>SLC24A4</i> rs67063100, alcohol consumption | 57.64                | <b>0.008</b> |
| <i>SLC24A4</i> rs67063100, physical activity   | 56.81                | <b>0.038</b> |
| <i>SLC24A4</i> rs67063100, social support      | 54.25                | 0.126        |

GMDR = generalized multifactor dimensionality reduction.

P value was based on 1,000 permutations. Analysis was obtained after adjustment for covariates including age, gender, and education. P values of < 0.05 are shown in bold.

genotype of *SLC24A4* rs67063100 (Supplementary Table S3).

Furthermore, statistical power analysis revealed that the present study had a 99.9% power to detect gene-gene interactions between *CASS4* and *SLC24A4*, between *EPHA1* and *SLC24A4*, between *FERMT2* and *SLC24A4*, as well as between *MEF2C* and *SLC24A4*. In addition, this study had a 91.3% power to detect a gene-gene interaction between *FERMT2* and *MEF2C*.

Moreover, Table 4 shows the GMDR analysis of gene-lifestyle interaction models in cognitive aging using age, gender, and education as covariates. As shown in Table 4, there was a significant two-way model involving *SLC24A4* rs67063100 and lifestyle factors such as smoking ( $P = 0.041$ ), alcohol consumption ( $P = 0.008$ ), and physical activity ( $P = 0.038$ ), indicating a potential gene-lifestyle interaction among *SLC24A4* and lifestyle factors in influencing cognitive aging. Similarly, there was a significant two-way model involving *MEF2C* rs9293506 and social support ( $P = 0.039$ ). However, there was no

significant two-way model involving lifestyle factors and other five SNPs including *CASS4* rs911159, *EPHA1* rs10952552, *FERMT2* rs4901317, *PLD3* rs11672825, and *RIN3* rs1885747.

## DISCUSSION

Our study is the first to date to pinpoint whether the main effects of 588 SNPs in 27 AD-associated genes are significantly associated with the risk of cognitive aging independently and/or through gene-gene interactions among old Taiwanese individuals. We also looked over the relationship between these genes and lifestyle factors to investigate whether these genes confer a risk of cognitive aging according to its impact on gene-lifestyle interactions. Here, we report for the first time that several SNPs of the AD-associated genes including *CASS4* rs911159, *EPHA1* rs10952552, *FERMT2* rs4901317, *MEF2C* rs9293506, *PLD3* rs11672825, *RIN3* rs1885747, and *SLC24A4* rs67063100 may play an important role in the modulation

of cognitive aging in old adults in a Taiwanese population. Notably, the significant association of the *CASS4* rs911159 SNP with MMSE scores persisted after correction for multiple testing ( $P < 2.8 \times 10^{-5}$ ). Additionally, our data revealed that gene-gene interactions of *EPHA1*, *MEF2C*, and *SLC24A4* may contribute to the etiology of cognitive aging. Our data also indicated that there were gene-lifestyle interactions of *SLC24A4* with lifestyle, such as smoking status, alcohol consumption, or physical activity. Finally, there was a gene-lifestyle interaction of *MEF2C* with social support.

To our knowledge, our results are the first to raise the possibility that 4 SNPs in the *CASS4* gene may contribute to the susceptibility for cognitive aging. Intriguingly, the *CASS4* rs911159 SNP ( $P = 2.2 \times 10^{-5}$ ) persisted a significant association with MMSE scores after Bonferroni correction. The *CASS4* gene is located on chromosome 20q13.31 and encodes a member of the Crk-associated substrate scaffolding protein family [17]. The protein encoded by the *CASS4* gene has been implicated in the regulation of cell spreading, focal adhesion integrity, and focal adhesion kinase activation [17]. Furthermore, we speculate that the *CASS4* gene may play a central role in the amyloid precursor protein (APP) and Tau protein, which are the hallmarks of AD [18]. The meta-analysis of GWAS studies by Lambert et al. identified the *CASS4* rs7274581 SNP as an AD risk variant [11]. In the following GWAS study, Beecham et al. confirmed an association between *CASS4* rs7274581 and AD by using brain autopsy data [19]. On the contrary, Ruiz et al. suggested that the *CASS4* rs7274581 polymorphism was unlikely to influence AD in a Spanish sample in the following replication study [20]. Furthermore, Rosenthal et al. reported a major involvement of the *CASS4* rs6024870 polymorphism in AD in another replication study by using the RegulomeDB database [21]. Wang et al. also demonstrated an association between *CASS4* rs16979934 and AD in a USA sample in a subsequent GWAS study [22]. Finally, it should be noted that the minor allele frequencies of the *imputed CASS4* rs7274581, rs16979934, and rs6024870 SNPs are all 0% in this study (Supplementary Table S4).

The second locus, the rs10952552 SNP, was identified at the *EPHA1* gene. The *EPHA1* gene is located on chromosome 7q34-35 and encodes a member of the ephrins family of tyrosine kinase receptors, which have been indicated in mediating developmental events in the nervous system [18]. Two GWAS studies by Naj et al. [9] and Hollingworth et al. [10] indicated that the *EPHA1* rs11767557 SNP may contribute to the reduced susceptibility for AD. Moreover, the following meta-analysis of GWAS studies implicated that the *EPHA1* rs11771145 may be involved with reduced AD susceptibility [11]. On the contrary, we failed to capture an association between the *EPHA1* rs11771145 SNP and cognitive aging.

In addition, an intriguing finding was a positive association of cognitive aging with 11 SNPs within the *SLC24A4* gene, especially the rs12435024, rs10431740, rs61977311, rs67063100, and rs12434016 SNPs. The *SLC24A4* gene, located on chromosome 14q32.12, encodes a member of the potassium-dependent sodium/calcium exchanger protein family, which might be connected to neurological development [23]. In a meta-analysis study, Lambert et al. pinpointed *SLC24A4* rs10498633 as an AD risk SNP [11]; however, *SLC24A4* rs10498633 had no association with cognitive aging in our study.

The fourth locus, the rs4901317 SNP, was within the *FERMT2* gene, which is located on chromosome 14q22.1. The corresponding protein of the *FERMT2* gene has been previously implicated with roles in cell adhesion and Tau neurotoxicity [24]. The *FERMT2* rs17125944 SNP has been reported to associate with AD susceptibility in a meta-analysis study [11], but *FERMT2* rs17125944 had no association with cognitive aging in our study.

On another note, there was an association of cognitive aging with 3 SNPs within the *PLD3* gene, particularly the rs11672825 SNP. The *PLD3* gene, located on chromosome 19q13.2, encodes a member of the phospholipase D family of enzymes, which influence processing of amyloid-beta precursor protein [12]. Cruchaga et al. identified a rare *PLD3* rs145999145 (Val232Met) as an AD risk variant in a whole-exome sequencing study [12]; however, the minor allele frequency of the *imputed PLD3* rs145999145 SNP is 0% in this study (Supplementary Table S4).

We also observed an association of cognitive aging with 4 SNPs within the *MEF2C* gene, notably the rs9293506 SNP. The *MEF2C* gene, located on chromosome 5q14.3, encodes a member of the MADS box transcription enhancer factor 2 family of proteins, which plays a major role in hippocampal synaptic connectivity and thus may regulate hippocampal-dependent learning and memory [25]. The *MEF2C* rs190982 SNP has been demonstrated to link with AD in a meta-analysis study [11]. In contrast, *MEF2C* rs190982 showed no association with cognitive aging in our study.

Furthermore, our analysis indicated a positive association of cognitive aging with 11 SNPs within the *RIN3* gene, especially the rs1885747 SNP. The *RIN3* gene, located on chromosome 14q32.12, is in the vicinity of the *SLC24A4* gene and encodes a member of the RIN family of Ras interaction-interference proteins, which interacts with the BIN1 protein that might be linked with an AD-relevant pathological process involving APP and Tau pathology [26].

Remarkably, another intriguing finding was that we further inferred the epistatic effects between *CASS4*, *EPHA1*, *FERMT2*, *MEF2C*, or *SLC24A4* in influencing cognitive aging by using the GMDR approach. To our knowledge, no other study has been conducted to weigh

gene-gene interactions between these genes. Besides the statistical significance, the potential biological mechanism under the interaction models was our concern. The functional relevance of the interactive impact of *CASS4*, *EPHA1*, *FERMT2*, *MEF2C*, or *SLC24A4* on cognitive aging remains to be elucidated. We further speculate that the *CASS4*, *EPHA1*, *FERMT2*, *MEF2C*, or *SLC24A4* genes may be involved in the same pathways or pathology. Yu et al. found that DNA methylation in the *SLC24A4* gene was associated with pathological AD diagnosis, suggesting that altered methylation in the *SLC24A4* gene might involve Tau pathology [27]. In addition, the *SLC24A4* gene is located next to the *RIN3* gene, which interacts with the *BIN1* gene in the Tau, APP [26], and endocytosis [28] pathways. By putting together the previous findings, the *SLC24A4*, *FERMT2*, and *CASS4* genes have been implicated in Tau pathology [11, 26]. Similarly, the *SLC24A4* and *EPHA1* genes are involved in the pathway of endocytosis [18, 28]. The *EPHA1* and *MEF2C* genes are also implicated in the process of immune response and neuroinflammation [11, 18]. Furthermore, the *SLC24A4* and *CASS4* genes have been linked with the metabolism of APP [11, 26].

In the GMDR analysis of gene-lifestyle interactions, we tracked down the interplay between the *SLC24A4* gene and lifestyle such as smoking, alcohol consumption, and physical activity as well as the interplay between the *MEF2C* gene and social support. It has been pointed out that common diseases are known to have a major genetic contribution, but only a small proportion of complex diseases overall is explained by the established candidate genes, suggesting that the impact of lifestyle and gene-lifestyle interactions will be essential in future studies [13, 29].

It is worth mentioning that the well-known MMSE, the most widely used screening test of cognition, can be easily administered in about 5 to 10 minutes; however, it has floor and ceiling effects, reducing variability in the data [30]. On the other hand, a well-validated scale in cognitive performance is the Alzheimer's Disease Assessment Scale - Cognitive section (ADAS-Cog), where a four-point change on ADAS-Cog has been established as a clinically important change in cognition [31]. But, ADAS-Cog takes around 40 minutes to administer, and its length makes ADAS-Cog unsuitable for clinical practice [30].

This study has both strengths and limitations. The main weakness was that our observations require much further research to pinpoint whether the present research findings are sustained in diverse ethnic groups [32-34]. Second, given that the mean age ( $\pm$ SD) of the sample was 64.2 ( $\pm$ 2.9), our findings are not generalizable to much older cohorts that would be at the highest risk of developing neurodegenerative disorders. The outlook for prospective clinical trials with other ethnic populations is still warranted to provide a comprehensive evaluation of the association and interactions of the investigated

variants with cognitive aging [35-37]. On the other hand, a key strength of our study was that we leveraged lifestyle data, which served a suitable opportunity to facilitate the interplay between the investigated variants and lifestyle factors.

## CONCLUSIONS

In conclusion, we explored an extensive analysis of the association as well as gene-gene and gene-lifestyle interactions of the AD-associated genes with cognitive aging in older Taiwanese subjects. Overall, results from the current study serve to highlight that the *CASS4*, *EPHA1*, *FERMT2*, *MEF2C*, *PLD3*, *RIN3*, and *SLC24A4* genes may affect the prevalence of cognitive aging independently and/or through complex gene-gene and gene-lifestyle interactions. Independent replication studies with a much larger number of participants will likely demonstrate further insights into the role of the cognitive aging-related genes tracked down in this study.

## MATERIALS AND METHODS

### Study population

This study incorporated Taiwanese Han Chinese subjects from the Taiwan Biobank [38-40]. The study cohort consisted of 634 participants. Ethical approval for the study was granted by the Internal Review Board of the Taiwan Biobank before conducting the study. Each subject signed the approved informed consent form. All experiments were performed in accordance with relevant guidelines and regulations.

Education was defined based on whether or not high school was attended. Current alcohol drinker was defined as currently drinking 150 ml of alcohol per week for more than six months. Current smoker was defined as currently smoking for more than six months. Physical activity was defined by the amount of exercise activity for more than three times and more than 30 minutes each time in each week. Social support was assessed based on marital status and whether or not living alone.

### Cognitive assessment

Global cognitive assessment was performed using the 30-point Mini-Mental State Examination (MMSE), which includes questions based on five domains such as orientation, registration, attention and calculation, recall, and language. We analyzed MMSE as a continuous outcome, as well as according to categories based on previously defined MMSE thresholds [30]: MMSE score  $\geq$  24 (normal) and MMSE score  $<$  24 (cognitive impairment).



## Genotyping

DNA was isolated from blood samples using a QIAamp DNA blood kit following the manufacturer's instructions (Qiagen, Valencia, CA, USA). The quality of the isolated genomic DNA was evaluated using agarose gel electrophoresis, and the quantity was determined by spectrophotometry [41, 42]. SNP genotyping was carried out using the custom Taiwan BioBank chips and run on the Axiom Genome-Wide Array Plate System (Affymetrix, Santa Clara, CA, USA). The SNP panel covered variants from the following 27 AD-associated genes: *ABCA7*, *APOE*, *BINI*, *CASS4*, *CD2AP*, *CD33*, *CELF1*, *CLU*, *CRI*, *DSG2*, *EPHA1*, *FERMT2*, *HLA-DRB1*, *HLA-DRB4*, *INPP5D*, *MEF2C*, *MS4A4A*, *MS4A4E*, *MS4A6E*, *NME8*, *PICALM*, *PLD3*, *PTK2B*, *RIN3*, *SLC24A4*, *SORL1*, and *ZCWPW1*.

In addition, *APOE* variants ( $\epsilon 2$ ,  $\epsilon 3$ , and  $\epsilon 4$ ) were derived from rs7412 and rs4420638, where rs4420638, a proxy for *APOE* rs429358, was used to impute rs429358 [43].

Moreover, we leveraged MACH [44] to carry out genotype imputation with 20 iterations of the Markov sampler, 200 states, and 1000 genomes reference panel. MACH employs a Markov Chain algorithm to impute missing genotypes by using haplotypes as templates [44].

## Statistical analysis

In this study, we weighed the association of the investigated SNP with MMSE scores by a general linear model using age, gender, education as covariates [45, 46]. The genotype frequencies were assessed for Hardy-Weinberg equilibrium using a  $\chi^2$  goodness-of-fit test with 1 degree of freedom (i.e. the number of genotypes minus the number of alleles). Multiple testing was adjusted by the Bonferroni correction. The criterion for significance was set at  $P < 0.05$  for all tests. Data are presented as the mean  $\pm$  standard deviation.

To investigate gene-gene and gene-lifestyle interactions, we leveraged the generalized multifactor dimensionality reduction (GMDR) method [47]. We tested two-way interactions using 10-fold cross-validation. The GMDR software provides some output parameters, including the testing accuracy and empirical  $P$  values, to assess each selected interaction. Furthermore, the testing accuracy is a measure of the degree to which the interaction accurately predicts case-control status with scores between 50% (implying that the model predicts no better than chance) and 100% (implying perfect prediction). Moreover, we provided age, gender, education as covariates for gene-gene and gene-lifestyle interaction models in our interaction analyses. Permutation testing obtains empirical  $P$  values of prediction accuracy as a benchmark based on 1,000 shuffles.

Based on the effect sizes in this study, the power to detect gene-gene interactions was evaluated by QUANTO software (<http://biostats.usc.edu/Quanto.html>).

## ACKNOWLEDGMENTS AND GRANT SUPPORT

The authors extend their sincere thanks to Vita Genomics, Inc. for funding this research. This work was supported by the Ministry of Economic Affairs in Taiwan (SBIR Grant S099000280249-154; EL), by Taipei Veterans General Hospital, Taiwan (Grants VGHUST103-G1-4-1, V105C-008, and V105E17-002-MY2-1; SJT), and by Ministry of Science and Technology, Taiwan (Grant MST 102-2314-B-002-117-MY3; PHK). In addition, we thank Emily Ting for English editing.

## CONFLICTS OF INTEREST

The authors declare no potential conflicts of interests.

## REFERENCES

1. Committee on the Public Health Dimensions of Cognitive Aging; Board on Health Sciences Policy; Institute of Medicine; Blazer DG, Yaffe K, Liverman CT, editors. Cognitive Aging: Progress in Understanding and Opportunities for Action. Washington, DC, USA: National Academies Press; 2015 Jul.
2. Katz MJ, Lipton RB, Hall CB, Zimmerman ME, Sanders AE, Verghese J, Dickson DW, Derby CA. Age-specific and sex-specific prevalence and incidence of mild cognitive impairment, dementia, and Alzheimer dementia in blacks and whites: a report from the Einstein Aging Study. *Alzheimer Dis Assoc Disord*. 2012; 26:335-43.
3. Barnes LL, Bennett DA. Alzheimer's disease in African Americans: risk factors and challenges for the future. *Health Aff (Millwood)*. 2014; 33:580-6.
4. Dubois B, Feldman HH, Jacova C, Hampel H, Molinuevo JL, Blennow K, DeKosky ST, Gauthier S, Selkoe D, Bateman R, Cappa S, Crutch S, Engelborghs S, et al. Advancing research diagnostic criteria for Alzheimer's disease: the IWG-2 criteria. *Lancet Neurol*. 2014; 13:614-29.
5. Jack CR Jr, Bennett DA, Blennow K, Carrillo MC, Feldman HH, Frisoni GB, Hampel H, Jagust WJ, Johnson KA, Knopman DS, Petersen RC, Scheltens P, Sperling RA, et al. A/T/N: An unbiased descriptive classification scheme for Alzheimer disease biomarkers. *Neurology*. 2016; 87:539-47.
6. Harold D, Abraham R, Hollingworth P, Sims R, Gerrish A, Hamshere ML, Pahwa JS, Moskva V, Dowzell K, Williams A, Jones N, Thomas C, Stretton A, et al. Genome-wide association study identifies variants at *CLU* and

- PICALM associated with Alzheimer's disease. *Nat Genet.* 2009; 41:1088-93.
7. Lambert JC, Heath S, Even G, Campion D, Sleegers K, Hiltunen M, Combarros O, Zelenika D, Bullido MJ, Tavernier B, Letenneur L, Bettens K, Berr C, et al. Genome-wide association study identifies variants at *CLU* and *CR1* associated with Alzheimer's disease. *Nat Genet.* 2009; 41:1094-9.
  8. Seshadri S, Fitzpatrick AL, Ikram MA, DeStefano AL, Gudnason V, Boada M, Bis JC, Smith AV, Carassquillo MM, Lambert JC, Harold D, Schrijvers EM, Ramirez-Lorca R, et al. Genome-wide analysis of genetic loci associated with Alzheimer disease. *JAMA.* 2010; 303:1832-40.
  9. Naj AC, Jun G, Beecham GW, Wang LS, Vardarajan BN, Buross J, Gallins PJ, Buxbaum JD, Jarvik GP, Crane PK, Larson EB, Bird TD, Boeve BF, et al. Common variants at *MS4A4/MS4A6E*, *CD2AP*, *CD33* and *EPHA1* are associated with late-onset Alzheimer's disease. *Nat Genet.* 2011; 43:436-41.
  10. Hollingworth P, Harold D, Sims R, Gerrish A, Lambert JC, Carrasquillo MM, Abraham R, Hamshere ML, Pahwa JS, Moskvinina V, Dowzell K, Jones N, Stretton A, et al. Common variants at *ABCA7*, *MS4A6A/MS4A4E*, *EPHA1*, *CD33* and *CD2AP* are associated with Alzheimer's disease. *Nat Genet.* 2011; 43:429-35.
  11. Lambert JC, Ibrahim-Verbaas CA, Harold D, Naj AC, Sims R, Bellenguez C, DeStefano AL, Bis JC, Beecham GW, Grenier-Boley B, Russo G, Thorton-Wells TA, Jones N, et al. Meta-analysis of 74,046 individuals identifies 11 new susceptibility loci for Alzheimer's disease. *Nat Genet.* 2013; 45:1452-8.
  12. Cruchaga C, Karch CM, Jin SC, Benitez BA, Cai Y, Guerreiro R, Harari O, Norton J, Budde J, Bertelsen S, Jeng AT, Cooper B, Skorupa T, et al. Rare coding variants in the phospholipase *D3* gene confer risk for Alzheimer's disease. *Nature.* 2014; 505:550-4.
  13. Ebbert MT, Ridge PG, Wilson AR, Sharp AR, Bailey M, Norton MC, Tschanz JT, Munger RG, Corcoran CD, Kauwe JS. Population-based analysis of Alzheimer's disease risk alleles implicates genetic interactions. *Biol Psychiatry.* 2014; 75:732-7.
  14. Ebbert MT, Boehme KL, Wadsworth ME, Staley LA; Alzheimer's Disease Neuroimaging Initiative; Alzheimer's Disease Genetics Consortium, Mukherjee S, Crane PK, Ridge PG, Kauwe JS. Interaction between variants in *CLU* and *MS4A4E* modulates Alzheimer's disease risk. *Alzheimers Dement.* 2016; 12:121-9.
  15. Chibnik LB, Shulman JM, Leurgans SE, Schneider JA, Wilson RS, Tran D, Aubin C, Buchman AS, Heward CB, Myers AJ, Hardy JA, Huentelman MJ, Corneveaux JJ, et al. *CR1* is associated with amyloid plaque burden and age-related cognitive decline. *Ann Neurol.* 2011; 69:560-9.
  16. Nettiksimmons J, Tranah G, Evans DS, Yokoyama JS, Yaffe K. Gene-based aggregate SNP associations between candidate AD genes and cognitive decline. *Age (Dordr.)* 2016; 38:41.
  17. Singh MK, Dadke D, Nicolas E, Serebriiskii IG, Apostolou S, Canutescu A, Egleston BL, Golemis EA. A novel Cas family member, *HEPL*, regulates *FAK* and cell spreading. *Mol Biol Cell.* 2008;19:1627-36.
  18. Karch CM, Goate AM. Alzheimer's disease risk genes and mechanisms of disease pathogenesis. *Biol Psychiatry.* 2015; 77:43-51.
  19. Beecham GW, Hamilton K, Naj AC, Martin ER, Huentelman M, Myers AJ, Corneveaux JJ, Hardy J, Vonsattel JP, Younkin SG, Bennett DA, De Jager PL, Larson EB, et al. Genome-wide association meta-analysis of neuropathologic features of Alzheimer's disease and related dementias. *PLoS Genet.* 2014; 10:e1004606.
  20. Ruiz A, Heilmann S, Becker T, Hernández I, Wagner H, Thelen M, Mauleón A, Rosende-Roca M, Bellenguez C, Bis JC, Harold D, Gerrish A, Sims R, et al. Follow-up of loci from the International Genomics of Alzheimer's Disease Project identifies *TRIP4* as a novel susceptibility gene. *Transl Psychiatry.* 2014; 4:e358.
  21. Rosenthal SL, Barmada MM, Wang X, Demirci FY, Kamboh MI. Connecting the dots: potential of data integration to identify regulatory SNPs in late-onset Alzheimer's disease GWAS findings. *PLoS One.* 2014; 9:e95152.
  22. Wang X, Lopez OL, Sweet RA, Becker JT, DeKosky ST, Barmada MM, Demirci FY, Kamboh MI. Genetic determinants of disease progression in Alzheimer's disease. *J Alzheimers Dis.* 2015; 43:649-55.
  23. Larsson M, Duffy DL, Zhu G, Liu JZ, Macgregor S, McRae AF, Wright MJ, Sturm RA, Mackey DA, Montgomery GW, Martin NG, Medland SE. GWAS findings for human iris patterns: associations with variants in genes that influence normal neuronal pattern development. *Am J Hum Genet.* 2011; 89:334-43.
  24. Shulman JM, Imboywa S, Giagtzoglou N, Powers MP, Hu Y, Devenport D, Chipendo P, Chibnik LB, Diamond A, Perrimon N, Brown NH, De Jager PL, Feany MB. Functional screening in *Drosophila* identifies Alzheimer's disease susceptibility genes and implicates Tau-mediated mechanisms. *Hum Mol Genet.* 2014; 23:870-7.
  25. Akhtar MW, Kim MS, Adachi M, Morris MJ, Qi X, Richardson JA, Bassel-Duby R, Olson EN, Kavalali ET, Monteggia LM. *In vivo* analysis of *MEF2* transcription factors in synapse regulation and neuronal survival. *PLoS One.* 2012; 7:e34863.
  26. Chapis J, Hansmannel F, Gistelinc M, Mounier A, Van Cauwenberghe C, Kolen KV, Geller F, Sottejeau Y, Harold D, Dourlen P, Grenier-Boley B, Kamatani Y, Delepine B, et al. Increased expression of *BIN1* mediates Alzheimer genetic risk by modulating tau pathology. *Mol Psychiatry.* 2013; 18:1225-34.
  27. Yu L, Chibnik LB, Srivastava GP, Pochet N, Yang J, Xu J, Kozubek J, Obholzer N, Leurgans SE, Schneider

- JA, Meissner A, De Jager PL, Bennett DA. Association of Brain DNA methylation in SORL1, ABCA7, HLA-DRB5, SLC24A4, and BIN1 with pathological diagnosis of Alzheimer disease. *JAMA Neurol.* 2015; 72:15-24.
28. Kajihio H, Saito K, Tsujita K, Kontani K, Araki Y, Kurosu H, Katada T. RIN3: a novel Rab5 GEF interacting with amphiphysin II involved in the early endocytic pathway. *J Cell Sci.* 2003; 116:4159-68.
  29. Lee SH, Harold D, Nyholt DR; ANZGene Consortium; International Endogene Consortium; Genetic and Environmental Risk for Alzheimer's disease Consortium, Goddard ME, Zondervan KT, Williams J, Montgomery GW, Wray NR, Visscher PM. Estimation and partitioning of polygenic variation captured by common SNPs for Alzheimer's disease, multiple sclerosis and endometriosis. *Hum Mol Genet.* 2013; 22:832-41.
  30. Sheehan B. Assessment scales in dementia. *Ther Adv Neurol Disord.* 2012; 5:349-58.
  31. Rockwood K, Fay S, Gorman M, Carver D, Graham JE. The clinical meaningfulness of ADAS-Cog changes in Alzheimer's disease patients treated with donepezil in an open-label trial. *BMC Neurol.* 2007; 7:26.
  32. Hsiao TJ, Hwang Y, Chang HM, Lin E. Association of the rs6235 variant in the proprotein convertase subtilisin/kexin type 1 (PCSK1) gene with obesity and related traits in a Taiwanese population. *Gene.* 2014; 533:32-7.
  33. Hsiao TJ, Lin E. A common rs7903146 variant of the transcription factor 7 like 2 gene is associated with type 2 diabetes mellitus and fasting glucose in a Taiwanese population. *Diabetes Metab.* (in press) doi: 10.1016/j.diabet.2016.05.003.
  34. Hsiao TJ, Lin E. Evaluation of the glutamine 27 glutamic acid polymorphism in the adrenoceptor beta 2 surface gene on obesity and metabolic phenotypes in Taiwan. *J Investig Med.* 2014; 62:310-5.
  35. Lane HY, Tsai GE, Lin E. Assessing gene-gene interactions in pharmacogenomics. *Mol Diagn Ther.* 2012; 16:15-27.
  36. Hsiao TJ, Lin E. Association of a common rs9939609 variant in the fat mass and obesity-associated (FTO) gene with obesity and metabolic phenotypes in a Taiwanese population: a replication study. *J Genet.* 2016; 95:595-601.
  37. Hsiao TJ, Lin E. A validation study of adiponectin rs266729 gene variant with type 2 diabetes, obesity, and metabolic phenotypes in a Taiwanese population. *Biochem Genet.* 2016; 54:830-841.
  38. Fan CT, Lin JC, Lee CH. Taiwan Biobank: a project aiming to aid Taiwan's transition into a biomedical island. *Pharmacogenomics.* 2008; 9:235-46.
  39. Lin E, Kuo PH, Liu YL, Yang AC, Kao CF, Tsai SJ. Association and interaction of APOA5, BUD13, CETP, LIPA and health-related behavior with metabolic syndrome in a Taiwanese population. *Sci Rep.* 2016; 6:36830.
  40. Chen CH, Yang JH, Chiang CW, Hsiung CN, Wu PE, Chang LC, Chu HW, Chang J, Song IW, Yang SL, Chen YT, Liu FT, Shen CY. Population structure of Han Chinese in the modern Taiwanese population based on 10,000 participants in the Taiwan Biobank project. *Hum Mol Genet.* 2016 Oct 18. [Epub ahead of print].
  41. Liou YJ, Bai YM, Lin E, Chen JY, Chen TT, Hong CJ, Tsai SJ. Gene-gene interactions of the INSIG1 and INSIG2 in metabolic syndrome in schizophrenic patients treated with atypical antipsychotics. *Pharmacogenomics J.* 2012; 12:54-61
  42. Hsiao TJ, Lin E. The ENPP1 K121Q polymorphism is associated with type 2 diabetes and related metabolic phenotypes in a Taiwanese population. *Mol Cell Endocrinol.* 2016; 433:20-25.
  43. Felsky D, Szeszko P, Yu L, Honer WG, De Jager PL, Schneider JA, Malhotra AK, Lencz T, Ikuta T, Pipitone J, Chakravarty MM, Lobaugh NJ, Mulsant BH, et al. The SORL1 gene and convergent neural risk for Alzheimer's disease across the human lifespan. *Mol Psychiatry.* 2014; 19:1125-32.
  44. Li Y, Willer CJ, Ding J, Scheet P, Abecasis GR. MaCH: using sequence and genotype data to estimate haplotypes and unobserved genotypes. *Genet Epidemiol.* 2010; 34:816-34.
  45. Hsiao TJ, Lin E. The Pro12Ala polymorphism in the peroxisome proliferator-activated receptor gamma (PPARG) gene in relation to obesity and metabolic phenotypes in a Taiwanese population. *Endocrine.* 2015; 48:786-93.
  46. Hsiao TJ, Hwang Y, Liu CH, Chang HM, Lin E. Association of the C825T polymorphism in the GNB3 gene with obesity and metabolic phenotypes in a Taiwanese population. *Genes Nutr.* 2013; 8:137-44.
  47. Lou XY, Chen GB, Yan L, Ma JZ, Zhu J, Elston RC, Li MD. A generalized combinatorial approach for detecting gene-by-gene and gene-by-environment interactions with application to nicotine dependence. *Am J Hum Genet.* 2007; 80:1125-1137.
