# Supplementary material for: Association and interaction effects of Alzheimer’s disease-associated genes and lifestyle on cognitive aging in older adults in a Taiwanese population
Source: PubMed Central journal article supplement (PMC5421828; doi:10.18632/oncotarget.15269), 2017-02-11
Supplement: oncotarget-08-24077-s001.pdf [file oncotarget-08-24077-s001.pdf]

**Supplementary Table S1.** Linear regression models of associations between the

MMSE scores and 586 SNPs in 27 AD-related genes.

| Gene         | CHR | SNP         | A1 | A2 | P (additive)           | P (recessive)          | P (dominant) |
|--------------|-----|-------------|----|----|------------------------|------------------------|--------------|
| <i>ABCA7</i> | 19  | rs10419707  | C  | T  | 0.5939                 | 0.6273                 | 0.4829       |
|              |     | rs3752228   | T  | C  | 0.7855                 | 0.8177                 | 0.2417       |
|              |     | rs3764645   | G  | A  | 0.8627                 | 0.7883                 | 0.9456       |
|              |     | rs3752232   | G  | A  | 0.7837                 | 0.8175                 | 0.2167       |
|              |     | rs3764650   | G  | T  | 0.1196                 | 0.1069                 | 0.5117       |
|              |     | rs4147912   | A  | C  | 0.0991                 | 0.1369                 | 0.0828       |
|              |     | rs3764651   | G  | A  | 0.3223                 | 0.4160                 | 0.3461       |
|              |     | rs3752246   | G  | C  | 0.2116                 | 0.1570                 | 0.7598       |
| <i>BINI</i>  | 2   | rs880436    | T  | C  | 0.5159                 | 0.6578                 | 0.5182       |
|              |     | rs1060743   | G  | A  | 0.1765                 | 0.3502                 | 0.1911       |
|              |     | rs13430398  | T  | C  | 0.7979                 | 0.8240                 | 0.4081       |
|              |     | rs10166461  | A  | G  | 0.9106                 | 0.9196                 | 0.7997       |
| <i>CASS4</i> | 20  | rs6127744   | T  | G  | 0.3067                 | 0.4335                 | 0.3106       |
|              |     | rs11698292  | C  | T  | 0.0051                 | 0.0051                 | 0.5446       |
|              |     | rs17365060  | G  | A  | 0.0114                 | 0.0118                 | 0.4350       |
|              |     | rs735780    | G  | A  | 0.8787                 | 0.8344                 | 0.5423       |
|              |     | rs911159    | A  | G  | 2.2 x 10 <sup>-5</sup> | 2.2 x 10 <sup>-5</sup> | 0.3264       |
|              |     | rs6024877   | C  | T  | 0.9169                 | 0.9106                 | 0.7484       |
|              |     | rs3787390   | A  | G  | 0.4958                 | 0.8604                 | 0.1924       |
|              |     | rs6069746   | C  | T  | 0.0051                 | 0.0060                 | 0.1917       |
|              |     | rs1884910   | C  | G  | 0.2339                 | 0.2804                 | 0.4124       |
|              |     | rs3746624   | C  | T  | 0.0784                 | 0.1525                 | 0.0746       |
| <i>CD2AP</i> | 6   | rs9357542   | G  | A  | 0.1837                 | 0.4709                 | 0.0182       |
|              |     | rs9349409   | T  | G  | 0.5505                 | 0.6375                 | 0.0772       |
|              |     | rs200869952 | T  | C  | 0.4940                 | 0.5728                 | 0.0929       |
|              |     | rs9395279   | T  | C  | 0.5587                 | 0.6425                 | 0.0877       |
|              |     | rs9395284   | A  | G  | 0.4615                 | 0.5166                 | 0.2744       |
|              |     | rs72871200  | T  | G  | 0.5839                 | 0.6199                 | 0.2751       |
|              |     | rs1485785   | C  | T  | 0.3285                 | 0.9296                 | 0.0259       |

|              |    |             |   |   |        |        |        |
|--------------|----|-------------|---|---|--------|--------|--------|
|              |    | rs28360587  | G | T | 0.3361 | 0.8859 | 0.0212 |
|              |    | rs10948368  | C | T | 0.4607 | 0.5165 | 0.2737 |
| <i>CD33</i>  | 19 | rs1399837   | C | G | 0.7453 | 0.7481 | 0.7746 |
|              |    | rs3826656   | A | G | 0.3420 | 0.5538 | 0.0549 |
|              |    | rs1710398   | C | A | 0.7422 | 0.7456 | 0.7389 |
|              |    | rs3865444   | A | C | 0.1251 | 0.1523 | 0.1397 |
|              |    | rs1354106   | G | T | 0.1041 | 0.1791 | 0.0198 |
|              |    | rs1399839   | C | A | 0.6767 | 0.6726 | 0.9442 |
|              |    | rs273653    | A | G | 0.6801 | 0.6726 | 0.8348 |
|              |    | rs1803254   | C | G | 0.3331 | 0.6759 | 0.0258 |
| <i>CELF1</i> | 11 | rs7933019   | C | G | 0.2383 | 0.4082 | 0.1883 |
|              |    | rs11039260  | A | C | 0.8276 | 0.8932 | 0.6173 |
|              |    | rs61895112  | C | T | 0.5707 | 0.8441 | 0.1496 |
| <i>CLU</i>   | 8  | rs2279590   | T | C | 0.8584 | 0.9056 | 0.6415 |
|              |    | rs9331908   | C | T | 0.7750 | 0.8389 | 0.5396 |
|              |    | rs11136000  | T | C | 0.7819 | 0.8396 | 0.5735 |
|              |    | rs1532278   | T | C | 0.9360 | 0.9924 | 0.6315 |
|              |    | rs9331888   | G | C | 0.2356 | 0.7134 | 0.1069 |
|              |    | rs9314349   | G | A | 0.2817 | 0.2756 | 0.9820 |
| <i>CRI</i>   | 1  | rs7525160   | C | G | 0.2022 | 0.2820 | 0.3076 |
|              |    | rs112822892 | G | A | 0.7589 | 0.7266 | 0.5921 |
|              |    | rs112741151 | A | G | 0.8683 | 0.8349 | 0.5366 |
|              |    | rs113830567 | T | C | 0.5415 | 0.7082 | 0.3481 |
|              |    | rs11371768  | A | N | 0.5755 | 0.8285 | 0.1636 |
|              |    | rs61822967  | A | G | 0.7935 | 0.5183 | 0.2920 |
|              |    | rs2274566   | T | C | 0.7139 | 0.9082 | 0.1880 |
|              |    | rs12034598  | G | A | 0.3674 | 0.6231 | 0.0856 |
|              |    | rs646817    | G | A | 0.4066 | 0.7016 | 0.0722 |
|              |    | rs10779330  | A | G | 0.4372 | 0.7222 | 0.0866 |
|              |    | rs12141045  | C | T | 0.4464 | 0.5987 | 0.2934 |
|              |    | rs7539922   | A | G | 0.5384 | 0.7941 | 0.1822 |
|              |    | rs677066    | C | T | 0.5690 | 0.8481 | 0.1914 |
|              |    | rs11118167  | C | T | 0.3289 | 0.4047 | 0.3434 |

|              |    |             |   |   |        |        |        |
|--------------|----|-------------|---|---|--------|--------|--------|
|              |    | rs6691117   | G | A | 0.5004 | 0.7652 | 0.1574 |
|              |    | rs3818361   | A | G | 0.8469 | 0.8254 | 0.3051 |
|              |    | rs7542544   | A | C | 0.7855 | 0.7515 | 0.1484 |
|              |    | rs6701713   | A | G | 0.8568 | 0.8105 | 0.3076 |
|              |    | rs117590864 | A | C | NA     | NA     | 0.4510 |
|              |    | rs1408078   | T | C | 0.9144 | 0.6406 | 0.4298 |
|              |    | rs17048010  | C | T | 0.8346 | 0.9339 | 0.3990 |
|              |    | rs12034383  | A | G | 0.2753 | 0.6941 | 0.0357 |
|              |    | rs12033963  | A | G | 0.0998 | 0.1654 | 0.0430 |
| <i>DSG2</i>  | 18 | rs9945031   | A | G | 0.5471 | 0.8797 | 0.2653 |
|              |    | rs9304099   | T | G | 0.5727 | 0.8690 | 0.3121 |
|              |    | rs78454147  | T | C | 0.1456 | 0.1359 | 0.4968 |
|              |    | rs11081701  | C | T | 0.8024 | 0.9270 | 0.6708 |
|              |    | rs56009511  | A | G | 0.8363 | 0.8075 | 0.6218 |
|              |    | rs2155948   | T | G | 0.8642 | 0.9885 | 0.7441 |
|              |    | rs2276149   | A | G | 0.6533 | 0.5890 | 0.9520 |
|              |    | rs9807379   | G | A | 0.8800 | 0.9548 | 0.4852 |
|              |    | rs2230233   | T | C | 0.9683 | 0.9112 | 0.9605 |
|              |    | rs62095194  | A | G | 0.9637 | 0.9053 | 0.8275 |
|              |    | rs10502572  | T | C | 0.8222 | 0.8122 | 0.9348 |
|              |    | rs10502573  | A | G | 0.5513 | 0.2429 | 0.7437 |
|              |    | rs2290128   | T | C | 0.5414 | 0.2411 | 0.7554 |
|              |    | rs1042769   | G | A | 0.4945 | 0.4884 | 0.9009 |
|              |    | rs1791235   | T | C | 0.4614 | 0.1804 | 0.1318 |
|              |    | rs11542765  | G | A | 0.7953 | 0.3950 | 0.6871 |
|              |    | rs1047433   | T | C | 0.4614 | 0.1804 | 0.1318 |
|              |    | rs1449077   | G | T | 0.5080 | 0.4999 | 0.9298 |
|              |    | rs1791158   | T | C | 0.3931 | 0.1938 | 0.3994 |
|              |    | rs17802774  | T | C | 0.9146 | 0.4970 | 0.3666 |
|              |    | rs57305209  | G | A | 0.7888 | 0.6770 | 0.7945 |
|              |    | rs12954678  | T | C | 0.5653 | 0.5609 | 0.9566 |
|              |    | rs1449080   | C | A | 0.8475 | 0.5818 | 0.5440 |
|              |    | rs1791202   | G | A | 0.6867 | 0.5030 | 0.8530 |
| <i>EPHA1</i> | 7  | rs7786333   | C | T | 0.6797 | 0.4160 | 0.8373 |
|              |    | rs4283960   | T | C | 0.2295 | 0.2668 | 0.4215 |

|            |   |   |        |        |        |
|------------|---|---|--------|--------|--------|
| rs62472728 | T | C | 0.2359 | 0.4160 | 0.0668 |
| rs12703526 | T | G | 0.5481 | 0.7110 | 0.1124 |
| rs11763230 | T | C | 0.2269 | 0.2640 | 0.1592 |
| rs11767557 | C | T | 0.2314 | 0.2688 | 0.1615 |
| rs11771145 | G | A | 0.7160 | 0.4348 | 0.7326 |
| rs68140767 | C | T | 0.2773 | 0.2613 | 0.2880 |
| rs79853540 | A | G | 0.4957 | 0.2904 | 0.4589 |
| rs76944341 | G | A | 0.3052 | 0.1664 | 0.4962 |
| rs76604048 | A | G | 0.3052 | 0.1664 | 0.4962 |
| rs6951852  | T | G | 0.9703 | 0.3833 | 0.1113 |
| rs67287524 | G | T | 0.3298 | 0.3166 | 0.3407 |
| rs4725618  | G | C | 0.1522 | 0.6225 | 0.0470 |
| rs4725619  | A | T | 0.1836 | 0.6580 | 0.0620 |
| rs10228407 | G | T | 0.5730 | 0.5504 | 0.9889 |
| rs62474771 | C | T | 0.7520 | 0.7076 | 0.3443 |
| rs6966814  | A | G | 0.5789 | 0.5536 | 0.9663 |
| rs62474772 | T | C | 0.7542 | 0.7189 | 0.3602 |
| rs72611568 | G | A | 0.9255 | 0.7967 | 0.8118 |
| rs9640385  | T | C | 0.1924 | 0.1523 | 0.9552 |
| rs6945924  | C | T | 0.7138 | 0.6438 | 0.2657 |
| rs10952552 | A | G | 0.0026 | 0.0018 | 0.5023 |
| rs10245852 | T | A | 0.9780 | 0.9796 | 0.5554 |
| rs12671578 | A | G | 0.7342 | 0.7044 | 0.7474 |
| rs10241042 | G | C | 0.5734 | 0.5117 | 0.9612 |
| rs4595035  | T | C | 0.7390 | 0.7078 | 0.7317 |
| rs28375232 | T | C | 0.9503 | 0.9482 | 0.9916 |
| rs72611570 | A | C | 0.1111 | 0.1122 | 0.5306 |
| rs72611571 | T | C | 0.9200 | 0.9111 | 0.5954 |
| rs1014069  | T | C | 0.6818 | 0.7267 | 0.5474 |
| rs7789906  | G | A | 0.8679 | 0.8901 | 0.8812 |
| rs10257939 | C | T | 0.7329 | 0.7810 | 0.7423 |
| rs72611573 | C | T | 0.7105 | 0.8160 | 0.6368 |
| rs12536735 | T | C | 0.5921 | 0.6093 | 0.7612 |
| rs17164309 | T | C | 0.6920 | 0.6955 | 0.8851 |
| rs78689898 | T | C | 0.7525 | 0.7065 | 0.5460 |
| rs1404634  | A | G | 0.8199 | 0.5937 | 0.6520 |
| rs73154237 | G | A | 0.8266 | 0.8367 | 0.8407 |

|               |    |             |   |   |        |        |        |
|---------------|----|-------------|---|---|--------|--------|--------|
|               |    | rs1404636   | T | G | 0.8450 | 0.6170 | 0.6445 |
|               |    | rs10256611  | A | C | 0.4499 | 0.4916 | 0.5840 |
|               |    | rs10808027  | C | T | 0.2608 | 0.2283 | 0.5912 |
|               |    | rs76033591  | G | A | 0.3967 | 0.4096 | 0.3415 |
|               |    | rs1525107   | A | G | 0.6226 | 0.6117 | 0.7852 |
|               |    | rs73154244  | A | G | 0.7005 | 0.6337 | 0.8737 |
|               |    | rs1525110   | C | T | 0.6320 | 0.6220 | 0.7900 |
|               |    | rs2966709   | A | G | 0.8428 | 0.8172 | 0.9553 |
|               |    | rs2966704   | A | G | 0.7421 | 0.8242 | 0.2564 |
|               |    | rs7809756   | A | C | 0.5476 | 0.5893 | 0.4755 |
|               |    | rs55664336  | C | T | 0.4767 | 0.4351 | 0.4271 |
|               |    | rs940700    | T | C | 0.6767 | 0.9424 | 0.2878 |
|               |    | rs55716333  | T | C | 0.5917 | 0.5461 | 0.4696 |
|               |    | rs2949754   | A | G | 0.6486 | 0.9526 | 0.2605 |
|               |    | rs2966699   | A | C | 0.2836 | 0.2858 | 0.7656 |
|               |    | rs2949763   | T | C | 0.8964 | 0.8913 | 0.9769 |
|               |    | rs2949766   | C | T | 0.8234 | 0.5689 | 0.3179 |
|               |    | rs2949769   | A | G | 0.8916 | 0.9708 | 0.5604 |
|               |    | rs74726243  | A | G | 0.3755 | 0.3920 | 0.2031 |
|               |    | rs2949770   | C | A | 0.3038 | 0.3113 | 0.6279 |
| <i>FERMT2</i> | 14 | rs55685925  | A | G | 0.8396 | 0.8996 | 0.5179 |
|               |    | rs4450307   | G | A | 0.9485 | 0.9743 | 0.4526 |
|               |    | rs7158114   | C | G | 0.7442 | 0.5738 | 0.4443 |
|               |    | rs8019279   | T | C | 0.7879 | 0.6125 | 0.4227 |
|               |    | rs9888615   | T | C | 0.5807 | 0.4232 | 0.4997 |
|               |    | rs7152918   | A | G | 0.4287 | 0.4454 | 0.1419 |
|               |    | rs8009633   | C | G | 0.3988 | 0.4245 | 0.5903 |
|               |    | rs74825460  | T | C | 0.0986 | 0.1087 | 0.4077 |
|               |    | rs4901317   | C | T | 0.0041 | 0.0047 | 0.0155 |
|               |    | rs957190    | C | T | 0.8941 | 0.7018 | 0.4352 |
|               |    | rs17125924  | G | A | 0.0849 | 0.0951 | 0.3777 |
|               |    | rs12878516  | A | C | 0.3826 | 0.1792 | 0.2808 |
|               |    | rs117696114 | T | G | 0.1039 | 0.1160 | 0.0838 |
|               |    | rs17125944  | C | T | 0.1753 | 0.2302 | 0.1423 |
|               |    | rs12888114  | T | C | 0.2836 | 0.2361 | 0.6607 |
|               |    | rs1958906   | A | C | 0.6242 | 0.4633 | 0.5009 |

|                 |   |            |        |        |        |        |        |
|-----------------|---|------------|--------|--------|--------|--------|--------|
| <i>HLA-DRB1</i> | 6 | rs35067512 | G      | A      | 0.0838 | 0.0872 | 0.1492 |
|                 |   | rs72850287 | C      | A      | NA     | NA     | 0.3377 |
|                 |   | rs9270493  | C      | T      | 0.4879 | 0.4748 | 0.8649 |
| <i>HLA-DRB4</i> | 6 | rs3828831  | C      | T      | 0.9696 | 0.8324 | 0.7488 |
| <i>INPP5D</i>   | 2 | rs12994169 | A      | G      | 0.8427 | 0.9901 | 0.5827 |
|                 |   | rs4973063  | G      | A      | 0.6917 | 0.8300 | 0.5602 |
|                 |   | rs4257390  | T      | C      | 0.0697 | 0.0696 | 0.7390 |
|                 |   | rs4073363  | G      | A      | 0.9039 | 0.9340 | 0.1884 |
|                 |   | rs6722679  | A      | G      | 0.9617 | 0.9544 | 0.9912 |
|                 |   | rs4973065  | A      | G      | 0.3445 | 0.3036 | 0.7407 |
|                 |   | rs56065581 | T      | C      | 0.7843 | 0.7956 | 0.6702 |
|                 |   | rs4586623  | C      | T      | 0.3140 | 0.4234 | 0.3676 |
|                 |   | rs7425956  | T      | C      | 0.8335 | 0.7168 | 0.3079 |
|                 |   | rs13387054 | A      | G      | 0.9232 | 0.6433 | 0.4705 |
|                 |   | rs4356648  | C      | A      | 0.9761 | 0.8797 | 0.3446 |
|                 |   | rs7608422  | A      | G      | 0.5106 | 0.8396 | 0.2605 |
|                 |   | rs7566856  | G      | A      | 0.8810 | 0.9471 | 0.5870 |
|                 |   | rs4335931  | T      | C      | 0.2940 | 0.3394 | 0.3554 |
|                 |   | rs4973069  | C      | A      | 0.6399 | 0.6168 | 0.8559 |
|                 |   | rs9288684  | T      | C      | 0.3876 | 0.3330 | 0.6459 |
|                 |   | rs9752615  | A      | G      | 0.3742 | 0.3116 | 0.5350 |
|                 |   | rs7570061  | A      | G      | 0.5184 | 0.4105 | 0.1952 |
|                 |   | rs68147208 | G      | A      | 0.3640 | 0.2910 | 0.2510 |
|                 |   | rs10933432 | C      | G      | 0.0774 | 0.0902 | 0.2355 |
|                 |   | rs10193128 | C      | T      | 0.9990 | 0.9872 | 0.9717 |
|                 |   | rs10933435 | A      | G      | 0.5244 | 0.4951 | 0.7324 |
|                 |   | rs10933436 | C      | A      | 0.5244 | 0.4951 | 0.7324 |
|                 |   | rs11693862 | A      | G      | 0.5244 | 0.4951 | 0.7324 |
|                 |   | rs11690230 | T      | G      | 0.2565 | 0.1974 | 0.8852 |
|                 |   | rs7421653  | G      | A      | 0.2301 | 0.1840 | 0.9987 |
|                 |   | rs7419666  | C      | T      | 0.4627 | 0.4466 | 0.9329 |
|                 |   | rs4430948  | G      | A      | 0.8349 | 0.8155 | 0.9317 |
| rs6715810       | T | C          | 0.7721 | 0.6023 | 0.2460 |        |        |
| rs10182994      | A | G          | 0.4631 | 0.4237 | 0.7439 |        |        |

|              |   |            |   |   |        |        |        |
|--------------|---|------------|---|---|--------|--------|--------|
|              |   | rs12474023 | A | G | 0.9844 | 0.9863 | 0.6315 |
|              |   | rs6740918  | A | G | 0.1764 | 0.2866 | 0.1960 |
|              |   | rs3890760  | C | T | 0.9107 | 0.8918 | 0.9810 |
|              |   | rs10203185 | T | C | 0.6574 | 0.6377 | 0.8431 |
|              |   | rs1135727  | A | G | 0.5841 | 0.4912 | 0.5467 |
|              |   | rs14243    | G | A | 0.6524 | 0.6895 | 0.7518 |
| <i>MEF2C</i> | 5 | rs588282   | G | T | 0.8110 | 0.5197 | 0.5962 |
|              |   | rs16903320 | C | T | 0.4235 | 0.4923 | 0.4838 |
|              |   | rs661311   | T | C | 0.7153 | 0.7014 | 0.2746 |
|              |   | rs616391   | C | T | 0.6917 | 0.4113 | 0.6303 |
|              |   | rs2247885  | T | C | 0.9221 | 0.6845 | 0.6307 |
|              |   | rs674747   | G | T | 0.3258 | 0.3360 | 0.4535 |
|              |   | rs770189   | G | C | 0.3558 | 0.1658 | 0.7691 |
|              |   | rs4521516  | C | G | 0.1392 | 0.1193 | 0.6678 |
|              |   | rs700588   | A | G | 0.3911 | 0.2160 | 0.6217 |
|              |   | rs160044   | C | T | 0.3739 | 0.2202 | 0.7105 |
|              |   | rs186233   | A | G | 0.2473 | 0.2304 | 0.8760 |
|              |   | rs302484   | G | A | 0.2277 | 0.2200 | 0.8105 |
|              |   | rs74366119 | A | G | 0.9492 | 0.9518 | 0.9281 |
|              |   | rs304145   | T | A | 0.1722 | 0.1354 | 0.6617 |
|              |   | rs216057   | C | T | 0.6102 | 0.4109 | 0.9957 |
|              |   | rs77381797 | C | T | 0.2938 | 0.2843 | 0.8396 |
|              |   | rs80043958 | G | A | 0.2061 | 0.2147 | 0.3315 |
|              |   | rs3850651  | G | T | 0.3263 | 0.2138 | 0.5271 |
|              |   | rs7737567  | T | C | 0.0360 | 0.0393 | 0.2992 |
|              |   | rs9293506  | T | C | 0.0081 | 0.0092 | 0.2157 |
|              |   | rs304141   | A | G | 0.7978 | 0.7508 | 0.0923 |
|              |   | rs74201556 | C | T | 0.3584 | 0.3752 | 0.4811 |
|              |   | rs11949307 | T | G | 0.0466 | 0.0374 | 0.7665 |
|              |   | rs770463   | T | C | 0.0706 | 0.0206 | 0.8429 |
|              |   | rs10085009 | A | T | NA     | NA     | 0.8914 |
|              |   | rs10075941 | T | C | 0.5552 | 0.5678 | 0.4374 |
|              |   | rs304132   | A | G | 0.0494 | 0.0705 | 0.1092 |
|              |   | rs10044186 | C | T | NA     | NA     | 0.2449 |
|              |   | rs190982   | G | A | 0.1200 | 0.1221 | 0.6341 |
|              |   | rs16903409 | G | A | 0.7270 | 0.8363 | 0.3943 |

|               |    |            |   |   |        |        |        |
|---------------|----|------------|---|---|--------|--------|--------|
|               |    | rs35372260 | A | G | 0.6270 | 0.6061 | 0.5780 |
|               |    | rs301706   | G | A | 0.7732 | 0.5258 | 0.1261 |
|               |    | rs177281   | A | G | 0.5395 | 0.5525 | 0.4421 |
|               |    | rs11952384 | G | A | 0.5464 | 0.5961 | 0.2889 |
|               |    | rs214137   | A | G | 0.5046 | 0.3462 | 0.4270 |
|               |    | rs214136   | A | G | 0.5042 | 0.3387 | 0.2496 |
|               |    | rs1455098  | A | G | 0.5701 | 0.4003 | 0.3886 |
|               |    | rs1427970  | A | G | 0.2001 | 0.1750 | 0.7248 |
|               |    | rs5869452  | N | G | 0.2862 | 0.2444 | 0.8548 |
|               |    | rs75797624 | G | A | 0.1841 | 0.1743 | 0.8608 |
| <i>MS4A4A</i> | 11 | rs12283601 | A | G | 0.0401 | 0.0794 | 0.0495 |
|               |    | rs1426248  | A | C | 0.2599 | 0.3660 | 0.0854 |
|               |    | rs3758866  | T | C | 0.5435 | 0.5532 | 0.7294 |
|               |    | rs2017549  | A | G | 0.2668 | 0.5117 | 0.1867 |
|               |    | rs7104122  | C | G | 0.3938 | 0.5143 | 0.0402 |
|               |    | rs10792260 | A | G | 0.7062 | 0.6317 | 0.9049 |
|               |    | rs1365246  | C | T | 0.5189 | 0.6639 | 0.0368 |
|               |    | rs17611079 | C | T | 0.1396 | 0.1365 | 0.5687 |
|               |    | rs56157839 | T | C | 0.5066 | 0.5147 | 0.7357 |
|               |    | rs1947360  | G | A | 0.7471 | 0.7477 | 0.8389 |
|               |    | rs10750931 | G | A | 0.8583 | 0.8605 | 0.9231 |
|               |    | rs2044981  | C | T | 0.7028 | 0.4701 | 0.6811 |
|               |    | rs6591561  | G | A | 0.6877 | 0.8566 | 0.5309 |
|               |    | rs6591562  | A | G | 0.4730 | 0.6105 | 0.0891 |
|               |    | rs78926217 | T | C | 0.5263 | 0.6584 | 0.1071 |
| <i>MS4A4E</i> | 11 | rs668287   | T | G | 0.7831 | 0.7396 | 0.3172 |
|               |    | rs10897016 | C | T | 0.1647 | 0.1821 | 0.1133 |
|               |    | rs11230193 | C | T | 0.1644 | 0.1811 | 0.1217 |
|               |    | rs607639   | A | G | 0.0318 | 0.0461 | 0.0263 |
|               |    | rs4939320  | C | T | 0.0612 | 0.1484 | 0.0419 |
|               |    | rs11230195 | T | C | 0.1418 | 0.1955 | 0.0581 |
|               |    | rs76174656 | C | T | 0.2521 | 0.2649 | 0.4887 |
|               |    | rs11230203 | A | G | 0.1647 | 0.1821 | 0.1133 |
|               |    | rs80340466 | C | T | 0.1534 | 0.1676 | 0.1508 |
|               |    | rs662674   | A | G | 0.0544 | 0.0734 | 0.0439 |



|               |    |             |   |   |        |        |        |
|---------------|----|-------------|---|---|--------|--------|--------|
|               |    | rs718376    | A | G | 0.0562 | 0.1567 | 0.0268 |
|               |    | rs611267    | A | G | 0.6691 | 0.7741 | 0.2634 |
|               |    | rs650853    | T | C | 0.0464 | 0.0657 | 0.0309 |
|               |    | rs1834554   | C | G | 0.3028 | 0.2647 | 0.1502 |
| <i>MS4A6E</i> | 11 | rs2304934   | G | A | 0.5932 | 0.8614 | 0.1462 |
|               |    | rs7931525   | G | A | 0.5750 | 0.9454 | 0.3226 |
|               |    | rs2289614   | C | G | 0.3481 | 0.3989 | 0.0399 |
|               |    | rs2165832   | A | G | 0.1388 | 0.2531 | 0.1906 |
|               |    | rs2289612   | A | C | 0.0571 | 0.2365 | 0.0128 |
|               |    | rs11230281  | C | A | 0.2208 | 0.0448 | 0.9815 |
|               |    | rs10736703  | C | T | 0.8067 | 0.8247 | 0.4895 |
|               |    | rs10212     | C | T | 0.4073 | 0.4861 | 0.4796 |
|               |    | rs2289610   | C | T | 0.0488 | 0.0712 | 0.1295 |
| <i>NME8</i>   | 7  | rs4723713   | A | G | 0.6531 | 0.5702 | 0.8799 |
|               |    | rs921397    | T | C | 0.7973 | 0.7902 | 0.7353 |
|               |    | rs4720262   | T | C | 0.6418 | 0.5823 | 0.2743 |
|               |    | rs2598046   | G | A | 0.5168 | 0.4949 | 0.6983 |
|               |    | rs2722372   | A | G | 0.9992 | 0.8145 | 0.1777 |
|               |    | rs59301349  | G | A | 0.9830 | 0.9995 | 0.5883 |
|               |    | rs55940848  | A | G | 0.7287 | 0.5864 | 0.8702 |
|               |    | rs10270230  | A | C | 0.6681 | 0.9605 | 0.4927 |
|               |    | rs2722353   | C | A | 0.8729 | 0.9530 | 0.1811 |
|               |    | rs2722355   | A | G | 0.7234 | 0.6871 | 0.4993 |
|               |    | rs77524454  | A | G | 0.9574 | 0.9084 | 0.1805 |
|               |    | rs17171184  | A | G | 0.9047 | 0.8722 | 0.5496 |
|               |    | rs2249451   | G | A | 0.8611 | 0.5426 | 0.2526 |
|               |    | rs2290224   | G | A | 0.7567 | 0.6346 | 0.9580 |
|               |    | rs118137117 | T | C | 0.9539 | 0.9688 | 0.2151 |
|               |    | rs3807171   | C | T | 0.7826 | 0.7040 | 0.7095 |
|               |    | rs1450845   | G | A | 0.8321 | 0.8128 | 0.8897 |
|               |    | rs2722311   | A | G | 0.6610 | 0.6210 | 0.9980 |
|               |    | rs2598031   | G | A | 0.7584 | 0.7177 | 0.9666 |
|               |    | rs77113930  | A | G | 0.9566 | 0.9759 | 0.7189 |
|               |    | rs62001868  | G | A | 0.6127 | 0.5697 | 0.9050 |
|               |    | rs2598021   | A | G | 0.8152 | 0.9121 | 0.5539 |

|               |    |             |   |   |        |        |        |
|---------------|----|-------------|---|---|--------|--------|--------|
|               |    | rs2598017   | C | G | 0.2340 | 0.0993 | 0.9313 |
|               |    | rs2598015   | G | A | 0.6147 | 0.4999 | 0.5644 |
|               |    | rs12532321  | A | G | 0.7571 | 0.7220 | 0.5769 |
|               |    | rs75991941  | T | C | 0.9122 | 0.8705 | 0.4769 |
|               |    | rs935765    | T | C | 0.6062 | 0.4839 | 0.5275 |
|               |    | rs2598010   | T | C | 0.6022 | 0.5014 | 0.6235 |
|               |    | rs2722366   | C | A | 0.6883 | 0.3769 | 0.6670 |
|               |    | rs6462793   | C | G | 0.8726 | 0.9112 | 0.4289 |
|               |    | rs2722365   | G | A | 0.5361 | 0.2858 | 0.5333 |
|               |    | rs1839585   | A | C | 0.8642 | 0.9834 | 0.3348 |
|               |    | rs10268173  | G | T | 0.8507 | 0.6296 | 0.5153 |
|               |    | rs2722349   | C | A | 0.3069 | 0.2790 | 0.6515 |
|               |    | rs2598006   | G | C | 0.6887 | 0.6872 | 0.9533 |
|               |    | rs2598124   | G | A | 0.5920 | 0.5974 | 0.8076 |
|               |    | rs10488616  | G | T | 0.9093 | 0.7372 | 0.7153 |
|               |    | rs2598123   | C | A | 0.7316 | 0.7172 | 0.9081 |
|               |    | rs3807184   | C | G | 0.9954 | 0.9746 | 0.6349 |
|               |    | rs3807185   | T | C | 0.6980 | 0.6839 | 0.6568 |
|               |    | rs7807193   | G | A | 0.9160 | 0.9729 | 0.7409 |
|               |    | rs113865274 | T | G | 0.8690 | 0.8948 | 0.7833 |
|               |    | rs2242026   | T | C | 0.7473 | 0.7670 | 0.8082 |
|               |    | rs72638248  | C | T | 0.4658 | 0.4476 | 0.5550 |
|               |    | rs71546608  | A | G | 0.2120 | 0.2106 | 0.6869 |
| <i>PICALM</i> | 11 | rs592314    | A | G | 0.0426 | 0.0187 | 0.9974 |
|               |    | rs11234495  | T | C | 0.1150 | 0.6105 | 0.0391 |
|               |    | rs510566    | T | G | 0.4308 | 0.4348 | 0.7060 |
|               |    | rs17209625  | T | A | 0.4638 | 0.3570 | 0.3182 |
|               |    | rs17817201  | T | C | 0.3133 | 0.3047 | 0.9107 |
|               |    | rs35206999  | C | T | 0.7605 | 0.7654 | 0.7994 |
|               |    | rs642949    | A | G | 0.1402 | 0.0841 | 0.7560 |
|               |    | rs664629    | G | A | 0.2972 | 0.3178 | 0.4813 |
|               |    | rs17817931  | C | T | 0.7558 | 0.7598 | 0.8227 |
|               |    | rs669556    | C | T | 0.0473 | 0.0261 | 0.8591 |
| <i>PLD3</i>   | 19 | rs4490097   | A | C | 0.0828 | 0.3329 | 0.0488 |
|               |    | rs7507651   | T | G | 0.0600 | 0.3177 | 0.0278 |

|              |   |             |   |   |        |        |        |
|--------------|---|-------------|---|---|--------|--------|--------|
|              |   | rs12151243  | T | G | 0.8260 | 0.8112 | 0.8841 |
|              |   | rs11083554  | G | C | 0.3246 | 0.9739 | 0.0768 |
|              |   | rs11672825  | T | G | 0.0160 | 0.1928 | 0.0071 |
| <i>PTK2B</i> | 8 | rs6986075   | C | T | 0.9143 | 0.7522 | 0.4019 |
|              |   | rs6557991   | T | C | 0.3678 | 0.3144 | 0.6825 |
|              |   | rs4291226   | A | G | 0.6822 | 0.6880 | 0.8086 |
|              |   | rs2322719   | A | G | 0.7464 | 0.6819 | 0.5396 |
|              |   | rs117601945 | A | C | 0.8368 | 0.8154 | 0.6248 |
|              |   | rs74317051  | T | C | 0.8885 | 0.8969 | 0.7126 |
|              |   | rs28547290  | G | A | 0.8892 | 0.3996 | 0.3074 |
|              |   | rs1879189   | A | G | 0.8346 | 0.4673 | 0.4221 |
|              |   | rs76082706  | A | G | 0.2631 | 0.2568 | 0.3585 |
|              |   | rs4534095   | G | A | 0.4106 | 0.4078 | 0.8593 |
|              |   | rs6987305   | A | G | 0.6258 | 0.6905 | 0.5866 |
|              |   | rs10109834  | C | A | 0.0372 | 0.0346 | 0.7298 |
|              |   | rs7016131   | T | C | 0.6617 | 0.3100 | 0.5403 |
|              |   | rs57729364  | A | C | NA     | NA     | 0.9514 |
|              |   | rs10097651  | T | C | 0.3158 | 0.3266 | 0.4095 |
|              |   | rs2322609   | G | A | 0.7498 | 0.7509 | 0.8689 |
|              |   | rs13266887  | C | T | 0.3448 | 0.3510 | 0.6748 |
|              |   | rs6557994   | C | T | 0.7118 | 0.7189 | 0.8472 |
|              |   | rs1429938   | G | A | 0.8281 | 0.7103 | 0.3555 |
|              |   | rs1429937   | T | C | 0.8020 | 0.7631 | 0.4590 |
|              |   | rs4732720   | A | G | 0.7524 | 0.6619 | 0.4991 |
|              |   | rs10086852  | C | G | 0.5193 | 0.4114 | 0.3377 |
|              |   | rs17057065  | T | C | 0.6839 | 0.7809 | 0.2882 |
|              |   | rs11776858  | G | A | 0.5121 | 0.5911 | 0.3795 |
|              |   | rs11777664  | G | A | 0.5101 | 0.5982 | 0.3415 |
|              |   | rs919491    | A | G | 0.5195 | 0.5950 | 0.3979 |
|              |   | rs919492    | G | T | 0.5195 | 0.5950 | 0.3979 |
|              |   | rs939267    | T | C | 0.7242 | 0.8633 | 0.4502 |
|              |   | rs17447958  | T | C | 0.7746 | 0.6741 | 0.4387 |
|              |   | rs1128433   | G | A | 0.5195 | 0.5950 | 0.3979 |
|              |   | rs1045511   | A | G | 0.4581 | 0.5237 | 0.3976 |
|              |   | rs1045512   | G | A | 0.5195 | 0.5950 | 0.3979 |
|              |   | rs2322718   | G | T | 0.5195 | 0.5950 | 0.3979 |

|             |    |            |   |   |        |        |        |
|-------------|----|------------|---|---|--------|--------|--------|
|             |    | rs2115805  | A | G | 0.5195 | 0.5950 | 0.3979 |
|             |    | rs2059968  | T | A | 0.5195 | 0.5950 | 0.3979 |
|             |    | rs2059969  | C | A | 0.5195 | 0.5950 | 0.3979 |
|             |    | rs7005183  | G | A | 0.7091 | 0.7695 | 0.6691 |
|             |    | rs1367088  | T | C | 0.3407 | 0.9092 | 0.0516 |
|             |    | rs17376459 | G | A | 0.8487 | 0.8306 | 0.4498 |
|             |    | rs7000615  | G | T | 0.9627 | 0.8072 | 0.8573 |
|             |    | rs3779633  | A | C | 0.8862 | 0.8166 | 0.8059 |
|             |    | rs725788   | C | T | 0.3391 | 0.2545 | 0.4635 |
|             |    | rs725787   | G | A | 0.8534 | 0.8354 | 0.4589 |
|             |    | rs3757908  | T | C | 0.9621 | 0.6988 | 0.7475 |
|             |    | rs4733057  | G | A | 0.8061 | 0.5098 | 0.7874 |
|             |    | rs2082100  | T | C | 0.9208 | 0.8572 | 0.7130 |
|             |    | rs17377462 | A | G | 0.8685 | 0.8126 | 0.3646 |
|             |    | rs919493   | T | C | 0.8562 | 0.8815 | 0.6426 |
|             |    | rs11995441 | C | T | 0.3917 | 0.2755 | 0.1043 |
|             |    | rs9773817  | G | A | NA     | NA     | 0.1630 |
|             |    | rs9657295  | A | G | 0.7317 | 0.9334 | 0.2341 |
|             |    | rs11135993 | C | T | 0.9486 | 0.8456 | 0.2743 |
|             |    | rs1019832  | A | G | 0.7773 | 0.7218 | 0.5786 |
|             |    | rs7846626  | C | G | 0.3497 | 0.2463 | 0.1455 |
| <i>RIN3</i> | 14 | rs7141239  | T | C | 0.4298 | 0.8192 | 0.1868 |
|             |    | rs1952330  | T | C | 0.6357 | 0.6735 | 0.6246 |
|             |    | rs7160605  | C | A | 0.7616 | 0.7909 | 0.7342 |
|             |    | rs56046485 | G | A | 0.1935 | 0.1785 | 0.6662 |
|             |    | rs34071903 | C | G | 0.6854 | 0.6932 | 0.8442 |
|             |    | rs7157447  | C | T | 0.9161 | 0.8611 | 0.7586 |
|             |    | rs10141468 | T | C | 0.4224 | 0.6483 | 0.3845 |
|             |    | rs8008855  | T | C | 0.1538 | 0.1376 | 0.8361 |
|             |    | rs4374096  | G | A | 0.1965 | 0.1950 | 0.4705 |
|             |    | rs10498634 | G | A | 0.3093 | 0.1610 | 0.7209 |
|             |    | rs77826962 | G | A | 0.7966 | 0.8219 | 0.7691 |
|             |    | rs10467865 | G | A | 0.2216 | 0.3673 | 0.0294 |
|             |    | rs4900135  | C | T | 0.2398 | 0.6372 | 0.0667 |
|             |    | rs1887559  | C | T | 0.1601 | 0.5709 | 0.0710 |
|             |    | rs10467867 | G | A | 0.1647 | 0.5789 | 0.0722 |

|            |   |   |        |        |        |
|------------|---|---|--------|--------|--------|
| rs11846004 | A | G | 0.6719 | 0.2865 | 0.4317 |
| rs12893289 | A | G | 0.7517 | 0.2477 | 0.2640 |
| rs10141449 | A | G | 0.9294 | 0.9135 | 0.1924 |
| rs12884739 | A | G | 0.2369 | 0.0500 | 0.5464 |
| rs736087   | A | G | 0.4553 | 0.4626 | 0.7144 |
| rs8008611  | A | G | 0.0877 | 0.1127 | 0.1582 |
| rs2104237  | C | T | 0.2773 | 0.4035 | 0.1739 |
| rs1885747  | G | A | 0.0097 | 0.0150 | 0.0399 |
| rs11160075 | A | G | 0.2881 | 0.1960 | 0.7473 |
| rs2402171  | A | G | 0.2202 | 0.3117 | 0.2433 |
| rs2402172  | C | A | 0.1579 | 0.2747 | 0.0638 |
| rs11623185 | G | A | 0.5145 | 0.5094 | 0.9142 |
| rs12433867 | G | A | 0.8187 | 0.4525 | 0.4165 |
| rs12435667 | A | C | 0.8041 | 0.4312 | 0.1801 |
| rs8012413  | A | G | 0.9853 | 0.8283 | 0.0245 |
| rs80267197 | A | G | 0.9882 | 0.9763 | 0.4989 |
| rs942058   | G | C | 0.2567 | 0.4335 | 0.1344 |
| rs9788510  | A | C | 0.0760 | 0.1120 | 0.0656 |
| rs79113623 | T | C | 0.0602 | 0.0899 | 0.0569 |
| rs4904957  | A | G | 0.2496 | 0.8781 | 0.0103 |
| rs9788624  | A | G | 0.0768 | 0.1137 | 0.0682 |
| rs9788457  | C | T | 0.3197 | 0.6101 | 0.0189 |
| rs749647   | A | C | 0.8473 | 0.9012 | 0.4655 |
| rs11160080 | T | C | 0.9222 | 0.7736 | 0.6208 |
| rs61975788 | T | C | 0.1415 | 0.2629 | 0.0519 |
| rs4904960  | C | T | 0.0329 | 0.0346 | 0.2626 |
| rs943655   | A | C | 0.0313 | 0.0270 | 0.4052 |
| rs10498635 | T | C | NA     | NA     | 0.8517 |
| rs11627032 | C | T | 0.1285 | 0.2603 | 0.0349 |
| rs4904970  | T | C | 0.6998 | 0.7138 | 0.4629 |
| rs8017311  | A | G | 0.0166 | 0.0320 | 0.0771 |
| rs11629324 | T | C | 0.7047 | 0.9805 | 0.1431 |
| rs12885166 | T | G | 0.3481 | 0.1606 | 0.8894 |
| rs9323880  | T | C | 0.1081 | 0.1738 | 0.0434 |
| rs11160087 | A | G | 0.8066 | 0.9433 | 0.2187 |
| rs6575272  | G | A | 0.5635 | 0.5338 | 0.8791 |
| rs942063   | G | A | 0.6229 | 0.7487 | 0.2212 |

|                |    |            |   |   |        |        |        |
|----------------|----|------------|---|---|--------|--------|--------|
| <i>SLC24A4</i> | 14 | rs72631607 | A | G | 0.1548 | 0.0321 | 0.9177 |
|                |    | rs6575246  | A | G | 0.1351 | 0.1012 | 0.4857 |
|                |    | rs2402130  | G | A | 0.5975 | 0.5892 | 0.4134 |
|                |    | rs8013152  | T | C | 0.4639 | 0.4547 | 0.2006 |
|                |    | rs56691294 | G | T | 0.2218 | 0.2794 | 0.1188 |
|                |    | rs12887287 | G | A | 0.1301 | 0.3397 | 0.1238 |
|                |    | rs35778179 | T | C | 0.4424 | 0.4687 | 0.2725 |
|                |    | rs2010747  | C | T | 0.4666 | 0.4534 | 0.1267 |
|                |    | rs66753927 | A | G | 0.9206 | 0.9360 | 0.7131 |
|                |    | rs4904886  | G | A | 0.4437 | 0.3170 | 0.7357 |
|                |    | rs12891074 | G | A | 0.6761 | 0.6547 | 0.9451 |
|                |    | rs61975636 | G | A | 0.8869 | 0.9126 | 0.5304 |
|                |    | rs12435939 | T | C | 0.7063 | 0.7058 | 0.9177 |
|                |    | rs8020526  | C | T | 0.3218 | 0.1535 | 0.2749 |
|                |    | rs8022236  | A | G | 0.1643 | 0.0436 | 0.1360 |
|                |    | rs4347559  | G | A | 0.9010 | 0.8900 | 0.6693 |
|                |    | rs59506823 | A | G | 0.9037 | 0.9298 | 0.7490 |
|                |    | rs72695142 | A | G | 0.5837 | 0.6344 | 0.2782 |
|                |    | rs4904889  | T | C | 0.3348 | 0.3434 | 0.6210 |
|                |    | rs61583500 | C | T | 0.2373 | 0.1896 | 0.7558 |
|                |    | rs4904890  | A | G | 0.6236 | 0.6811 | 0.2350 |
|                |    | rs4904896  | C | T | 0.2630 | 0.2018 | 0.8253 |
|                |    | rs4904897  | T | C | 0.6209 | 0.6847 | 0.1945 |
|                |    | rs11845652 | G | A | 0.9840 | 0.9619 | 0.7595 |
|                |    | rs4904901  | T | G | 0.0869 | 0.0858 | 0.4901 |
|                |    | rs11624865 | G | A | 0.0977 | 0.0877 | 0.6815 |
|                |    | rs4904903  | A | G | 0.3545 | 0.4218 | 0.0725 |
|                |    | rs12435024 | A | G | 0.0065 | 0.0054 | 0.2517 |
|                |    | rs17128291 | G | A | 0.4486 | 0.4829 | 0.3496 |
|                |    | rs10138927 | C | G | 0.0378 | 0.0411 | 0.3164 |
|                |    | rs10431740 | T | C | 0.0055 | 0.0041 | 0.2292 |
|                |    | rs12588761 | G | A | 0.4606 | 0.5471 | 0.5264 |
|                |    | rs28579858 | T | C | 0.2336 | 0.2288 | 0.9040 |
|                |    | rs7152962  | G | A | 0.1715 | 0.2440 | 0.2779 |
|                |    | rs10147889 | G | A | 0.9805 | 0.8315 | 0.2242 |
|                |    | rs8016437  | C | T | 0.9163 | 0.9094 | 0.2461 |

|            |   |   |        |        |        |
|------------|---|---|--------|--------|--------|
| rs77185674 | A | G | 0.4314 | 0.4253 | 0.8522 |
| rs12432774 | A | G | 0.6943 | 0.7049 | 0.6978 |
| rs734504   | A | G | 0.7072 | 0.3103 | 0.1917 |
| rs12433292 | T | C | 0.6607 | 0.7350 | 0.2835 |
| rs12588868 | T | C | 0.7663 | 0.7220 | 0.6851 |
| rs74073080 | T | C | 0.6821 | 0.6763 | 0.9684 |
| rs61977294 | A | G | 0.3780 | 0.4437 | 0.0703 |
| rs11160066 | C | T | 0.3739 | 0.8892 | 0.1401 |
| rs8015178  | T | C | 0.3696 | 0.9094 | 0.0760 |
| rs7144273  | C | T | 0.5424 | 0.3721 | 0.9329 |
| rs10137770 | G | A | 0.6691 | 0.9799 | 0.1000 |
| rs7158400  | T | C | 0.2803 | 0.2277 | 0.8513 |
| rs10498633 | T | G | 0.1667 | 0.1646 | 0.9190 |
| rs10134832 | A | G | 0.1045 | 0.0519 | 0.1452 |
| rs61977311 | A | G | 0.0099 | 0.0256 | 0.0049 |
| rs67063100 | A | G | 0.0447 | 0.0811 | 0.0038 |
| rs11160069 | T | C | 0.0380 | 0.1208 | 0.0537 |
| rs77248792 | G | A | 0.1808 | 0.1004 | 0.1499 |
| rs9323877  | G | A | 0.1265 | 0.2512 | 0.1735 |
| rs61116143 | T | G | 0.2851 | 0.2998 | 0.5559 |
| rs4497611  | G | C | 0.0528 | 0.0680 | 0.2173 |
| rs4904929  | C | T | 0.0528 | 0.0680 | 0.2173 |
| rs11160070 | C | T | 0.7295 | 0.9838 | 0.3136 |
| rs11160071 | T | C | 0.7521 | 0.8451 | 0.5254 |
| rs12434016 | G | T | 0.0041 | 0.0194 | 0.0127 |
| rs78476646 | C | A | 0.6939 | 0.7315 | 0.6029 |
| rs1952323  | G | A | 0.6958 | 0.7409 | 0.5542 |
| rs10431637 | C | A | 0.0998 | 0.1395 | 0.0199 |
| rs2149054  | C | A | 0.7081 | 0.7496 | 0.5884 |
| rs2182838  | T | C | 0.5183 | 0.5559 | 0.5021 |
| rs12589691 | A | G | 0.7353 | 0.7320 | 0.8874 |
| rs10135174 | A | G | 0.2216 | 0.2631 | 0.2319 |
| rs11623937 | A | G | 0.3357 | 0.2618 | 0.9762 |
| rs17783630 | C | A | 0.5786 | 0.6667 | 0.5665 |
| rs10150603 | T | C | 0.2217 | 0.2618 | 0.2419 |
| rs61977322 | C | T | 0.8523 | 0.8373 | 0.6144 |
| rs7150406  | A | G | 0.4167 | 0.4277 | 0.6682 |

|              |    |             |   |   |        |        |        |
|--------------|----|-------------|---|---|--------|--------|--------|
|              |    | rs79685763  | A | G | 0.4541 | 0.3118 | 0.6883 |
|              |    | rs78739077  | T | G | 0.0253 | 0.0287 | 0.1273 |
|              |    | rs76960688  | C | T | 0.1290 | 0.1436 | 0.0905 |
| <i>SORL1</i> | 11 | rs4935774   | C | T | 0.3497 | 0.3645 | 0.5922 |
|              |    | rs578506    | G | C | 0.8413 | 0.8498 | 0.2665 |
|              |    | rs3824963   | G | A | 0.2871 | 0.4009 | 0.0558 |
|              |    | rs661057    | T | C | 0.8823 | 0.1551 | 0.0373 |
|              |    | rs3862605   | C | T | 0.2521 | 0.3450 | 0.0460 |
|              |    | rs3862606   | G | A | 0.4101 | 0.2867 | 0.7502 |
|              |    | rs3781825   | C | T | 0.5769 | 0.4597 | 0.0163 |
|              |    | rs4936632   | G | A | 0.6016 | 0.3854 | 0.0330 |
|              |    | rs11218301  | A | G | 0.9097 | 0.9743 | 0.2599 |
|              |    | rs3781826   | A | T | 0.7921 | 0.6987 | 0.3020 |
|              |    | rs33961761  | N | G | 0.4740 | 0.2148 | 0.7949 |
|              |    | rs11218304  | G | A | 0.7490 | 0.8138 | 0.2323 |
|              |    | rs12276905  | G | A | 0.7811 | 0.6777 | 0.1648 |
|              |    | rs4631890   | A | G | 0.1456 | 0.0441 | 0.2666 |
|              |    | rs985421    | A | G | 0.8347 | 0.6742 | 0.1485 |
|              |    | rs687228    | A | G | 0.7619 | 0.3440 | 0.0600 |
|              |    | rs987482    | C | T | 0.8897 | 0.8136 | 0.1136 |
|              |    | rs668387    | C | T | 0.8280 | 0.2868 | 0.0693 |
|              |    | rs200748970 | A | G | NA     | NA     | 0.9911 |
|              |    | rs2298813   | A | G | 0.6364 | 0.6425 | 0.8014 |
|              |    | rs11218319  | T | C | 0.3480 | 0.3781 | 0.2164 |
|              |    | rs666004    | G | A | 0.0942 | 0.1189 | 0.2287 |
|              |    | rs11501162  | T | C | 0.1441 | 0.1452 | 0.6954 |
|              |    | rs3781827   | G | A | 0.9796 | 0.3514 | 0.2783 |
|              |    | rs10892754  | G | A | 0.8711 | 0.3118 | 0.3557 |
|              |    | rs79187659  | T | C | 0.8823 | 0.9194 | 0.2858 |
|              |    | rs2276345   | C | A | 0.5255 | 0.7619 | 0.0515 |
|              |    | rs11218325  | C | A | 0.9186 | 0.4288 | 0.0861 |
|              |    | rs11604897  | T | C | 0.0652 | 0.0732 | 0.3276 |
|              |    | rs7946599   | A | G | 0.8875 | 0.8746 | 0.7415 |
|              |    | rs6589885   | A | G | 0.8876 | 0.8746 | 0.7376 |
|              |    | rs556349    | G | T | 0.9843 | 0.8308 | 0.1729 |
|              |    | rs11218339  | G | A | 0.6422 | 0.6401 | 0.9547 |



|               |   |             |   |   |        |        |        |
|---------------|---|-------------|---|---|--------|--------|--------|
|               |   | rs1699108   | T | A | 0.8639 | 0.7944 | 0.1654 |
|               |   | rs1784920   | A | G | 0.3009 | 0.3454 | 0.4484 |
|               |   | rs1790213   | G | A | 0.6614 | 0.7976 | 0.5237 |
|               |   | rs4420280   | C | A | 0.7323 | 0.5538 | 0.0872 |
|               |   | rs67140863  | C | G | 0.6423 | 0.4525 | 0.0591 |
|               |   | rs117806822 | T | C | 0.1852 | 0.1759 | 0.9337 |
|               |   | rs2070045   | T | G | 0.9955 | 0.8895 | 0.8112 |
|               |   | rs3781835   | A | G | 0.4568 | 0.4370 | 0.3541 |
|               |   | rs59260691  | A | G | 0.0513 | 0.0503 | 0.4766 |
|               |   | rs1625828   | A | G | 0.7936 | 0.9453 | 0.5156 |
|               |   | rs10892759  | G | A | 0.7339 | 0.9530 | 0.3543 |
|               |   | rs1620003   | A | G | 0.4345 | 0.3996 | 0.2779 |
|               |   | rs1629493   | A | G | 0.7208 | 0.6253 | 0.1734 |
|               |   | rs3737529   | T | C | 0.6981 | 0.8582 | 0.2200 |
|               |   | rs726601    | C | T | 0.7724 | 0.8929 | 0.6683 |
|               |   | rs1784933   | G | A | 0.4917 | 0.4646 | 0.8493 |
|               |   | rs10892761  | T | C | 0.7491 | 0.5717 | 0.8318 |
|               |   | rs117097913 | G | A | 0.3336 | 0.3247 | 0.2718 |
|               |   | <hr/>       |   |   |        |        |        |
| <i>ZCWPWI</i> | 7 | rs2286266   | T | G | 0.0701 | 0.0682 | 0.8958 |
|               |   | rs3815257   | A | G | 0.5008 | 0.5577 | 0.4795 |
|               |   | rs2286265   | T | C | 0.2052 | 0.1669 | 0.3327 |
|               |   | rs5015755   | T | G | 0.0352 | 0.0321 | 0.7478 |
|               |   | rs5015756   | C | T | 0.4979 | 0.4107 | 0.8601 |

A1 = minor allele, A2 = major allele, AD = Alzheimer's disease, Chr = chromosome,

MMSE = Mini-Mental State Examination.

Analysis was obtained after adjustment for covariates including age, gender, and education.

**Supplementary Table S2.** (A) The distribution of *APOE* alleles; (B) Results of analyses of association between the MMSE scores and the *APOE*  $\epsilon$ 4 allele.

A.

| Gene        | CHR | $\epsilon$ 2 (%) | $\epsilon$ 3 (%) | $\epsilon$ 4 (%) |
|-------------|-----|------------------|------------------|------------------|
| <i>APOE</i> | 19  | 6.2              | 82.7             | 11.1             |

B.

| Analysis                                                        | BETA  | SE   | P      |
|-----------------------------------------------------------------|-------|------|--------|
| (1) <i>APOE</i> $\epsilon$ 4 (carriers versus non-carriers)     | -0.02 | 0.04 | 0.8469 |
| (2) <i>APOE</i> $\epsilon$ 4 (heterozygose versus non-carriers) | -0.02 | 0.04 | 0.7478 |
| (3) <i>APOE</i> $\epsilon$ 4 (homozygose versus non-carriers)   | -0.02 | 0.04 | 0.6713 |

BETA = Beta coefficients, Chr = chromosome, MMSE = Mini-Mental State

Examination, SE = standard error.

Analysis was obtained after adjustment for covariates including age, gender, and education.

**Supplementary Table S3.** Multivariable logistic regression analysis for the two-way gene-gene interaction models.

| Two-way interaction model                                              | OR   | 95% CI     | P value <sup>b</sup> |
|------------------------------------------------------------------------|------|------------|----------------------|
| <b>(a) <i>CASS4</i> and <i>SLC24A4</i></b>                             |      |            |                      |
| rs911159 (GG genotype) with<br>rs67063100 (GG genotype) <sup>a</sup>   | 1    |            |                      |
| rs911159 (AA genotype) with<br>rs67063100 (GG genotype)                | 7.05 | 1.19-41.77 | <b>0.0315</b>        |
| rs911159 (AG genotype) with<br>rs67063100 (AA+AG genotype)             | 2.25 | 1.04-4.89  | <b>0.0399</b>        |
| rs911159 (AG genotype) with<br>rs67063100 (GG genotype)                | 1.34 | 0.71-2.54  | 0.3708               |
| rs911159 (GG genotype) with<br>rs67063100 (AA+AG genotype)             | 1.87 | 1.05-3.31  | <b>0.0328</b>        |
| <b>(b) <i>EPHA1</i> and <i>SLC24A4</i></b>                             |      |            |                      |
| rs10952552 (GG genotype) with<br>rs67063100 (GG genotype) <sup>a</sup> | 1    |            |                      |
| rs10952552 (AA genotype) with<br>rs67063100 (GG genotype)              | 0.38 | 0.08-1.74  | 0.2152               |
| rs10952552 (AG genotype) with<br>rs67063100 (AA+AG genotype)           | 2.26 | 1.12-4.58  | <b>0.0232</b>        |
| rs10952552 (AG genotype) with<br>rs67063100 (GG genotype)              | 0.95 | 0.51-1.77  | 0.8799               |
| rs10952552 (GG genotype) with<br>rs67063100 (AA+AG genotype)           | 1.49 | 0.81-2.72  | 0.1994               |

(c) *FERMT2* and *MEF2C*

|                                                                      |      |            |        |
|----------------------------------------------------------------------|------|------------|--------|
| rs4901317 (TT genotype) with<br>rs9293506 (CC genotype) <sup>a</sup> | 1    |            |        |
| rs4901317 (CC genotype) with<br>rs9293506 (CC genotype)              | 5.56 | 0.48-64.75 | 0.1711 |
| rs4901317 (CT genotype) with<br>rs9293506 (TC genotype)              | 2.13 | 0.42-10.72 | 0.3582 |
| rs4901317 (CT genotype) with<br>rs9293506 (CC genotype)              | 1.67 | 0.75-3.72  | 0.2065 |
| rs4901317 (TT genotype) with<br>rs9293506 (TC genotype)              | 1.67 | 0.97-2.89  | 0.0653 |
| rs4901317 (TT genotype) with<br>rs9293506 (TT genotype)              | 5.17 | 0.86-31.16 | 0.0733 |

(d) *FERMT2* and *SLC24A4*

|                                                                          |      |            |               |
|--------------------------------------------------------------------------|------|------------|---------------|
| rs4901317 (CT genotype) with<br>rs67063100 (AA+AG genotype) <sup>a</sup> | 1    |            |               |
| rs4901317 (TT genotype) with<br>rs67063100 (AA+AG genotype)              | 0.37 | 0.13-1.06  | 0.0652        |
| rs4901317 (CC genotype) with<br>rs67063100 (GG genotype)                 | 1.29 | 0.09-17.95 | 0.8516        |
| rs4901317 (CT genotype) with<br>rs67063100 (GG genotype)                 | 0.22 | 0.06-0.89  | <b>0.0334</b> |
| rs4901317 (TT genotype) with<br>rs67063100 (GG genotype)                 | 0.23 | 0.08-0.64  | <b>0.0047</b> |

(e) *MEF2C* and *SLC24A4*

|                                                                       |      |            |               |
|-----------------------------------------------------------------------|------|------------|---------------|
| rs9293506 (CC genotype) with<br>rs67063100 (GG genotype) <sup>a</sup> | 1    |            |               |
| rs9293506 (CC genotype) with<br>rs67063100 (AA+AG genotype)           | 1.86 | 1.07-3.24  | <b>0.0275</b> |
| rs9293506 (TC genotype) with<br>rs67063100 (AA+AG genotype)           | 2.79 | 1.17-6.68  | <b>0.0210</b> |
| rs9293506 (TC genotype) with<br>rs67063100 (GG genotype)              | 1.67 | 0.88-3.17  | 0.1134        |
| rs9293506 (TT genotype) with<br>rs67063100 (AA+AG genotype)           | 4.60 | 0.25-83.37 | 0.3021        |
| rs9293506 (TT genotype) with<br>rs67063100 (GG genotype)              | 7.01 | 0.70-69.95 | 0.0970        |

---

CI = confidence interval, OR = odds ratio.

<sup>a</sup> Reference.

<sup>b</sup> Versus reference. Analysis was obtained after adjustment for covariates including age, gender, and education. P values of < 0.05 are shown in bold.

**Supplementary Table S4.** Imputed SNPs in 2 AD-related genes.

| Gene         | CHR | SNP         | A1 | A2 | MAF  |
|--------------|-----|-------------|----|----|------|
| <i>CASS4</i> | 20  | rs7274581   | C  | T  | 0.00 |
|              |     | rs16979934  | C  | T  | 0.00 |
|              |     | rs6024870   | A  | G  | 0.00 |
| <i>PLD3</i>  | 19  | rs145999145 | A  | G  | 0.00 |

A1 = minor allele, A2 = major allele, AD = Alzheimer's disease, Chr = chromosome,

MAF = minor allele frequency.
